# Supplementary material
Source: MDPI journal article supplement (https://www.mdpi.com/1424-8247/17/5/614)

# Comprehensive Chemical Profiling and Mechanistic Insight into Anticancer Activity of *Annona muricata* Leaves Extract

Rehab H. Abdallah <sup>1,\*</sup>, Al-sayed R. Al-Attar <sup>2</sup>, Youssef M. Shehata <sup>3</sup>, Doaa M. Abdel-Fattah <sup>3</sup>, Rahnaa M. Atta <sup>3</sup>, Omer I. Fantoukh <sup>4</sup> and Ahmed M. Mustafa <sup>5</sup>

<sup>1</sup> Department of Pharmacognosy, Faculty of Pharmacy, Zagazig University, Zagazig 44519, Egypt

<sup>2</sup> Department of Pathology, Faculty of Veterinary Medicine, Zagazig University, Zagazig 44519, Egypt; sayedattar50@gmail.com

<sup>3</sup> Department of Biochemistry, Faculty of Veterinary Medicine, Zagazig University, Zagazig 7120001, Egypt; rehabayman4117@gmail.com (Y.M.S.); rahnaaatta@yahoo.com (R.M.A.)

<sup>4</sup> Department of Pharmacognosy, College of Pharmacy, King Saud University, P.O. Box 2457, Riyadh 11451, Saudi Arabia; ofantoukh@ksu.edu.sa

<sup>5</sup> Chemistry Interdisciplinary Project (CHIP), School of Pharmacy, University of Camerino, Via Madonna delle Carceri, 62032 Camerino, Italy; ahmed.mustafa@unicam.it

\* Correspondence: rehabhamed2000@yahoo.com

**Abstract:** The aqueous extract of *Annona muricata* L. leaves was thoroughly analyzed using the UPLC-MS/MS, in addition to a new approach of examination of the extract's impact on cancer of EAC(Ehrlich ascites carcinoma) in albino male mice. The aim was to investigate the diversity of the phytochemical constituents of the aqueous leaf capsule extract and their impacts on EAC as anticancer agents. The UPLC-ESI-MS/MS screening resulted in 410 tentatively identified metabolites. Among them, 384 compounds were tentatively identified in a previous study, besides a number of 26 compounds belonging to acetogenins, phenolics, flavonoids, alkaloids, and other miscellaneous compounds, which were exclusively identified in the aqueous extract of the leaf capsule. Interestingly, a new compound was tentatively characterized as galloyl-quinic acid-rutinoside. This study also demonstrated that treating EAC mice with an extract from *A. muricata* leaves significantly improved the abnormalities in the expression of pro-apoptotic (Bax and caspase-3) and anti-apoptotic (Bcl-2) genes. Furthermore, the extract showed good protection against induced Ehrlich hepatocarcinoma, according to the microscopical, histological, and immune-histochemical analyses of the liver tissues and tumor mass.

**Keywords :** *Annona muricata*; leaves ; UPLC-ESI-MS/MS; immunohistochemistry; molecular biology

## Content

| No.              | Title                                                                                                                                                                                                                                                                              | Pages |
|------------------|------------------------------------------------------------------------------------------------------------------------------------------------------------------------------------------------------------------------------------------------------------------------------------|-------|
| <b>Table S1</b>  | Phytochemical compounds (AGEs) detected and characterized in <i>A. muricata</i> in the ethanolic extract of fruit , water extract of the edible part of the fruit & aqueous extract of the leaves capsule by using HPLC–ESI-MS/MS in positive and negative ionization modes.       | 3-8   |
| <b>Table S2</b>  | Phytochemical compounds (PIs) detected and characterized in <i>A. muricata</i> in the ethanolic extract of fruit , water extract of the edible part of the fruit & aqueous extract of the leaves capsule by using HPLC–ESI -MS/MS in positive and negative ionization modes.       | 9-12  |
| <b>Table S3</b>  | Phytochemical compounds (FIs) detected and characterized <i>A. muricata</i> in the ethanolic extract of fruit , water extract of the edible part of the fruit & aqueous extract of the leaves capsule by using HPLC–ESI -MS/MS in positive and negative ionization modes.          | 13-16 |
| <b>Table S4</b>  | Phytochemical compounds(Alks) detected and characterized <i>A. muricata</i> in the ethanolic extract of fruit , water extract of the edible part of the fruit & aqueous extract of the leaves capsule by using HPLC–ESI -MS/MS in positive and negative ionization modes.          | 17-18 |
| <b>Table S5</b>  | Phytochemical compounds (miscellaneous) detected and characterized <i>A. muricata</i> in the ethanolic extract of fruit , water extract of the edible part of the fruit & aqueous extract of the leaves capsule by using HPLC–ESI-MS/MS in positive and negative ionization modes. | 19-20 |
| <b>Figure S1</b> | Some compounds characterized from <i>A. muricata</i> aqueous leaves capsules extract.                                                                                                                                                                                              | 21-24 |
| <b>Figure S2</b> | Photomicrograph of the recorded histopathological changes in the tumor mass and hepatic tissues of different experimental groups                                                                                                                                                   | 25    |
| <b>Figure S3</b> | Photomicrograph of the recorded immunohistopathological changes in the tumor mass and hepatic tissues of different experimental groups                                                                                                                                             | 26-27 |

**Table S1.** Phytochemical compounds (AGEs) detected and characterized in *A. muricata* in the ethanolic extract of fruit , water extract of the edible part of the fruit & aqueous extract of the leaves capsule by using HPLC–ESI-MS/MS in positive and negative ionization modes

| No | Cpd-name                    | Rt    | Mwt | M ± | Ms/Ms Fragment      | Ref.                                                                           | E | W | C |
|----|-----------------------------|-------|-----|-----|---------------------|--------------------------------------------------------------------------------|---|---|---|
| 1  | *Muridienin-I               | 16.76 | 514 | 513 | 514                 | (Bermejo et al., 2005)                                                         | ✓ | ✗ | ✗ |
| 2  | **Annofolin                 | 16.87 | 253 | 252 | 252                 | (Jacobo-Herrera et al., 2019)                                                  | ✓ | ✓ | ✓ |
| 3  | *Cohebin A/B                | 17.71 | 548 | 547 | 548                 | (Moghadamtousi et al., 2015), (Bermejo et al., 2005)                           | ✗ | ✗ | ✓ |
| 4  | *Muricatacin                | 17.98 | 284 | 283 | 283                 | (Moghadamtousi et al., 2015)                                                   | ✓ | ✓ | ✓ |
| 5  | *Muricatin-C                | 18.06 | 610 | 609 | 609,577             | (Zafra-Polo et al., 1996), (Bermejo et al., 2005)                              | ✓ | ✓ | ✓ |
| 6  | *Muricin-J                  | 19.05 | 414 | 415 | 415                 | (Moghadamtousi et al., 2015)                                                   | ✓ | ✓ | ✓ |
| 7  | **Squamocin-O1/O2           | 19.15 | 638 | 639 | 621,603             | (Avula et al., 2018)                                                           | ✓ | ✗ | ✓ |
| 8  | ***Trilobalicin             | 19.62 | 610 | 609 | 609,557,539,521     | (Avula et al., 2018)                                                           | ✓ | ✓ | ✓ |
| 9  | *Norcorydine                | 19.64 | 327 | 328 | 328,192             | (Moghadamtousi et al., 2015)<br>,(Avula et al., 2018)                          | ✓ | ✓ | ✓ |
| 10 | *Epomuricenin A,B           | 19.70 | 530 | 529 | 529,292,152         | (Moghadamtousi et al., 2015), (Bermejo et al., 2005),(Zafra-Polo et al., 1996) | ✓ | ✓ | ✓ |
| 11 | *Deacetyl uvaricin          | 19.77 | 606 | 607 | 607,571,553         | (Avula et al., 2018)                                                           | ✗ | ✗ | ✓ |
| 12 | *Epomusenin A               | 19.84 | 558 | 559 | 558,336,299,265     | (Moghadamtousi et al., 2015), (Bermejo et al., 2005).                          | ✓ | ✓ | ✓ |
| 13 | *Muricatenol                | 19.92 | 608 | 607 | 607                 | (Moghadamtousi et al., 2015), (Bermejo et al., 2005)                           | ✓ | ✓ | ✓ |
| 14 | *Muricin I                  | 19.95 | 606 | 607 | 607,571,553         | (Moghadamtousi et al., 2015),(Bermejo et al., 2005)                            | ✗ | ✗ | ✓ |
| 15 | *5-Cis-reticulatacin-10-one | 19.97 | 606 | 607 | 607,571,553         | (Moghadamtousi et al., 2015), (Bermejo et al., 2005)                           | ✗ | ✗ | ✓ |
| 16 | *Annomuricin A              | 19.99 | 612 | 611 | 611,593,575,539     | (Moghadamtousi et al., 2015), (Bermejo et al., 2005)                           | ✗ | ✓ | ✓ |
| 17 | *Annomuricin B              | 20.06 | 612 | 611 | 611,593,575,539     | (Moghadamtousi et al., 2015), (Bermejo et al., 2005)                           | ✗ | ✓ | ✓ |
| 18 | **Squamostatin A            | 20.07 | 638 | 639 | 621,603             | (Avula et al., 2018)                                                           | ✓ | ✗ | ✓ |
| 19 | **Uvaricin                  | 20.08 | 648 | 649 | 649,613,595         | (Bermejo et al., 2005)                                                         | ✓ | ✗ | ✓ |
| 20 | *Gigantecin                 | 20.30 | 638 | 639 | 621,603,533,403,391 | (Champy et al., 2009), (Avula et al., 2018)                                    | ✓ | ✗ | ✓ |
| 21 | *Annonacin                  | 20.46 | 596 | 597 | 579,561,543,525     | (Moghadamtousi et al., 2015), (Avula et al., 2018)                             | ✓ | ✓ | ✓ |
| 22 | ***Parvifloracin            | 20.48 | 610 | 609 | 609,557,539,521     | (Avula et al., 2018)                                                           | ✓ | ✓ | ✓ |

|    |                                |       |     |     |                 |                                                      |   |   |   |
|----|--------------------------------|-------|-----|-----|-----------------|------------------------------------------------------|---|---|---|
| 23 | •Annomuricin C                 | 20.53 | 612 | 611 | 611,593,575,539 | (Moghadamtousi et al., 2015), (Bermejo et al., 2005) | ✗ | ✓ | ✓ |
| 24 | •Muricatocin A                 | 20.68 | 612 | 611 | 611,593,575,539 | (Moghadamtousi et al., 2015), (Bermejo et al., 2005) | ✗ | ✓ | ✓ |
| 25 | •Annonacin-10-one              | 20.69 | 594 | 593 | 577,559,541,523 | (Moghadamtousi et al., 2015),(Avula et al., 2018)    | ✓ | ✓ | ✓ |
| 26 | ••Purpurediolin                | 20.82 | 638 | 639 | 349,531         | (Avula et al., 2018)                                 | ✓ | ✗ | ✓ |
| 27 | •Muricatocin B                 | 20.84 | 612 | 611 | 611,593,575,539 | (Moghadamtousi et al., 2015),(Bermejo et al., 2005)  | ✗ | ✓ | ✓ |
| 28 | •Muricatocin C                 | 20.85 | 612 | 611 | 611,593,575,539 | (Moghadamtousi et al., 2015) (Bermejo et al., 2005)  | ✗ | ✓ | ✓ |
| 29 | •••Salzmanolin                 | 20.87 | 654 | 655 | 655,619         | (Avula et al., 2018)                                 | ✓ | ✗ | ✓ |
| 30 | •Iso-annonacin-10-one          | 20.88 | 594 | 593 | 577,559,541,523 | (Moghadamtousi et al., 2015),(Avula et al., 2018)    | ✓ | ✓ | ✓ |
| 31 | ••Annoglaucin                  | 20.91 | 638 | 639 | 621,567,549,531 | (Gomes et al., 2019) ,(Avula et al., 2018)           | ✓ | ✗ | ✓ |
| 32 | •Cis-annonacin-10-one          | 20.91 | 594 | 593 | 577,559,541,523 | (Moghadamtousi et al., 2015),(Avula et al., 2018)    | ✓ | ✓ | ✓ |
| 33 | •Muridienin-2                  | 20.95 | 542 | 541 | 542             | (Bermejo et al., 2005)                               | ✓ | ✗ | ✗ |
| 34 | •Muricin K                     | 21.05 | 442 | 441 | 441             | (Moghadamtousi et al., 2015)                         | ✗ | ✓ | ✓ |
| 35 | ••10-hydroxyasmicin            | 21.07 | 638 | 639 | 621,567,549,531 | (Avula et al., 2018)                                 | ✓ | ✗ | ✓ |
| 36 | •Muricadienin                  | 21.39 | 514 | 513 | 514             | (Moghadamtousi et al., 2015), (Bermejo et al., 2005) | ✓ | ✗ | ✗ |
| 37 | •Muricatalacin                 | 21.40 | 612 | 611 | 611,593,575,539 | (Bermejo et al., 2005)                               | ✗ | ✓ | ✓ |
| 38 | •Monticristin                  | 21.41 | 574 | 575 | 575,557         | (Moghadamtousi et al., 2015), (Bermejo et al., 2005) | ✓ | ✗ | ✓ |
| 39 | •Cohebin C                     | 21.50 | 576 | 577 | 577,558         | (Moghadamtousi et al., 2015), (Bermejo et al., 2005) | ✓ | ✓ | ✓ |
| 40 | ••Montanacin B/C               | 21.71 | 610 | 609 | 609,557,539,521 | (Bermejo et al., 2005)                               | ✓ | ✓ | ✓ |
| 41 | •Cohebin D                     | 21.73 | 576 | 577 | 577,558         | (Moghadamtousi et al., 2015), (Bermejo et al., 2005) | ✓ | ✓ | ✓ |
| 42 | •Annomuricin E                 | 21.75 | 612 | 611 | 611,593,575,539 | (Bermejo et al., 2005)                               | ✗ | ✓ | ✓ |
| 43 | •Muricapentocin                | 21.86 | 612 | 611 | 611,593,575,539 | (Bermejo et al., 2005)                               | ✗ | ✓ | ✓ |
| 44 | •2,4-trans-isoannonacin-10-one | 21.90 | 594 | 593 | 577,559,541,523 | (Moghadamtousi et al., 2015),(Avula et al., 2018)    | ✓ | ✓ | ✓ |
| 45 | •Epumurin B                    | 21.95 | 532 | 533 | 531,295,277,237 | (Melot et al., 2009)                                 | ✓ | ✓ | ✓ |
| 46 | •Annonacin-A                   | 22.05 | 596 | 597 | 579,561,543,525 | (Moghadamtousi et al., 2015), (Avula et al., 2018)   | ✓ | ✓ | ✓ |
| 47 | ••Bullatanocin                 | 22.06 | 638 | 639 | 621,603,567,549 | (Adesanwo et al., 2020) ,(Avula et al., 2018)        | ✓ | ✗ | ✓ |
| 48 | •• 12,15-cis-bullatanocin      | 22.08 | 638 | 639 | 621,603,567,549 | (Adesanwo et al., 2020) ,(Avula et al., 2018)        | ✓ | ✗ | ✓ |
| 49 | •10-Hydroxytrilobacin          | 22.09 | 638 | 639 | 621,603,567     | (Avula et al., 2018)                                 | ✓ | ✗ | ✓ |

|    |                            |       |     |     |                      |                                                                         |   |   |   |
|----|----------------------------|-------|-----|-----|----------------------|-------------------------------------------------------------------------|---|---|---|
| 50 | •Dieporeticanin            | 22.40 | 574 | 575 | 575,557              | (Zafra-Polo et al., 1996),(Bermejo et al., 2005)                        | ✓ | × | ✓ |
| 51 | •Muricin D                 | 22.44 | 568 | 569 | 569,533              | (Moghadamtousi et al., 2015)                                            | × | × | ✓ |
| 52 | ••Squamocin B              | 22.45 | 594 | 593 | 577,559,541,523      | (Le Ven et al., 2014) ,(Bermejo et al., 2005)                           | ✓ | ✓ | ✓ |
| 53 | ••Montacin(cis)            | 22.62 | 610 | 609 | 609,557,539,521      | (Bermejo et al., 2005)                                                  | ✓ | ✓ | ✓ |
| 54 | ••Asimitrin                | 22.65 | 638 | 639 | 621,603,567          | (Avula et al., 2018)                                                    | ✓ | × | ✓ |
| 55 | ••4-Hydroxy trilobin       | 22.85 | 638 | 639 | 621,603,567          | (Avula et al., 2018)                                                    | ✓ | × | ✓ |
| 56 | •• 4-Acetyl-annonacin      | 22.87 | 638 | 639 | 621,603,567          | (Avula et al., 2018)                                                    | ✓ | × | ✓ |
| 57 | ••4-Acetylxylomaticin      | 22.90 | 638 | 639 | 621,603,567          | (Avula et al., 2018)                                                    | ✓ | × | ✓ |
| 58 | ••Bullatalicin             | 23.00 | 638 | 639 | 527,469,329,309,241  | (Rupprecht et al., 1990),(Le Ven et al., 2012),<br>(Avula et al., 2018) | ✓ | × | ✓ |
| 59 | ••Bullatetrocin            | 23.01 | 638 | 639 | 621,603,567          | (Avula et al., 2018)                                                    | ✓ | × | ✓ |
| 60 | •Muricin E                 | 23.02 | 568 | 569 | 569,533              | (Moghadamtousi et al., 2015)                                            | × | × | ✓ |
| 61 | •Cis-annonacin             | 23.03 | 596 | 597 | 579,561,543,525      | (Moghadamtousi et al., 2015), (Avula et al., 2018)                      | ✓ | ✓ | ✓ |
| 62 | ••Coreaheptocin A          | 23.16 | 642 | 641 | 641,607              | (Gomes et al., 2019)                                                    | ✓ | × | ✓ |
| 63 | •Cis-goniothalamacin       | 23.17 | 596 | 597 | 484,384,308          | (Moghadamtousi et al., 2015), (Bermejo et al., 2005)                    | ✓ | ✓ | ✓ |
| 64 | •Corepoxylone              | 23.19 | 560 | 561 | 651                  | (Moghadamtousi et al., 2015) , (Zafra-Polo et al., 1996)                | ✓ | ✓ | ✓ |
| 65 | •Cis-corossolone           | 23.22 | 578 | 579 | 579,445,338,298      | (Moghadamtousi et al., 2015), (Le Ven et al., 2014)                     | ✓ | × | ✓ |
| 66 | •Javoricin                 | 23.25 | 596 | 597 | 597,579,661          | (Moghadamtousi et al., 2015), (Bermejo et al., 2005)                    | ✓ | ✓ | ✓ |
| 67 | •Muridienin-3              | 23.43 | 542 | 541 | 542                  | (Moghadamtousi et al., 2015), (Bermejo et al., 2005)                    | ✓ | × | × |
| 68 | •Muridienin-4              | 23.72 | 542 | 541 | 542                  | (Moghadamtousi et al., 2015), (Bermejo et al., 2005)                    | ✓ | × | × |
| 69 | •Annonacinone(cis)         | 23.79 | 594 | 593 | 577,559,541,523      | (Bonneau et al., 2017),(Avula et al., 2018)                             | ✓ | ✓ | ✓ |
| 70 | ••Annoheptocin B           | 23.90 | 672 | 671 | 671                  | (Gomes et al., 2019)                                                    | ✓ | × | ✓ |
| 71 | •Annocinone                | 23.93 | 594 | 593 | 577,559,541,523      | (Moghadamtousi et al., 2015)                                            | ✓ | ✓ | ✓ |
| 72 | •Arianacin                 | 23.95 | 596 | 597 | 597,579,661          | (Moghadamtousi et al., 2015), (Bermejo et al., 2005),                   | ✓ | ✓ | ✓ |
| 73 | ••Coreaheptocin B          | 24.07 | 642 | 641 | 641,607              | (Gomes et al., 2019)                                                    | ✓ | × | ✓ |
| 74 | •Annoreticu-9-one          | 24.08 | 594 | 593 | 577,559,541,523      | (Moghadamtousi et al., 2015), (Ragasa et al., 2014)                     | ✓ | ✓ | ✓ |
| 75 | •Cis-annorecticuin         | 24.09 | 596 | 597 | 597,579,661          | (Moghadamtousi et al., 2015) ,(Ragasa et al., 2014)                     | ✓ | ✓ | ✓ |
| 76 | •AnocatacinAand B          | 24.10 | 578 | 579 | 579,561,,543,525,507 | (Moghadamtousi et al., 2015), (Bermejo et al., 2005)                    | ✓ | × | ✓ |
| 77 | ••Neoannonin (squamocin J) | 24.26 | 578 | 579 | 579,310,270,243      | (Zafra-Polo et al., 1996)                                               | ✓ | × | ✓ |
| 78 | •Gigantetrocin A           | 24.28 | 596 | 597 | 597,579,661          | (Moghadamtousi et al., 2015), (Bermejo et al., 2005),                   | ✓ | ✓ | ✓ |
| 79 | •Motrilin                  | 24.34 | 622 | 623 | 510,320,390,392      | (Le Ven et al., 2014),(Avula et al., 2018)                              | ✓ | ✓ | ✓ |

|     |                      |       |     |     |                 |                                                                               |   |   |   |
|-----|----------------------|-------|-----|-----|-----------------|-------------------------------------------------------------------------------|---|---|---|
| 80  | •Epomusenin B        | 24.95 | 558 | 559 | 558,336,299,265 | (Moghadamtousi et al., 2015), (Bermejo et al., 2005).                         | ✓ | ✓ | ✓ |
| 81  | •Annomutacin         | 25.02 | 624 | 623 | 623,607,589,553 | (Moghadamtousi et al., 2015),(Avula et al., 2018)                             | ✓ | ✓ | ✓ |
| 82  | •Gigantetrocin B     | 25.11 | 596 | 597 | 597,579,661     | (Moghadamtousi et al., 2015), (Bermejo et al., 2005).                         | ✓ | ✓ | ✓ |
| 83  | ••Annoheptocin A     | 25.15 | 670 | 671 | 671             | (Gomes et al., 2019)                                                          | ✓ | ✗ | ✓ |
| 84  | •Muricatetrocin A/B  | 25.23 | 596 | 597 | 597,579,661     | (Moghadamtousi et al., 2015), (Bermejo et al., 2005).                         | ✓ | ✓ | ✓ |
| 85  | ••Goniotriocin       | 25.27 | 636 | 637 | 637,619         | (Gomes et al., 2019)                                                          | ✓ | ✓ | ✓ |
| 86  | •Muricin A           | 25.37 | 596 | 597 | 597,579,661     | (Moghadamtousi et al., 2015), (Bermejo et al., 2005).                         | ✓ | ✓ | ✓ |
| 87  | •• 9-oxo-asimicinone | 25.48 | 636 | 637 | 637,619         | (Champy et al., 2009)                                                         | ✓ | ✓ | ✓ |
| 88  | •Muricatin A         | 25.63 | 612 | 611 | 611,593,575,539 | (Zafra-Polo et al., 1996) ,(Bermejo et al., 2005)                             | ✗ | ✓ | ✓ |
| 89  | •Muricin B           | 25.70 | 596 | 597 | 597,579,661     | (Moghadamtousi et al., 2015), (Bermejo et al., 2005).                         | ✓ | ✓ | ✓ |
| 90  | •Muricatin B         | 25.75 | 612 | 611 | 611,593,575,539 | (Zafra-Polo et al., 1996) ,(Bermejo et al., 2005)                             | ✗ | ✓ | ✓ |
| 91  | •Chatenaytrienin 1+2 | 25.76 | 540 | 539 | 539             | (Moghadamtousi et al., 2015),(Bermejo et al., 2005)                           | ✗ | ✓ | ✓ |
| 92  | •Solamin             | 25.77 | 564 | 563 | 563             | (Moghadamtousi et al., 2015)                                                  | ✗ | ✗ | ✓ |
| 93  | •Muricatalin         | 25.86 | 612 | 611 | 611,593,575,539 | (Bermejo et al., 2005)                                                        | ✗ | ✓ | ✓ |
| 94  | •Annopentocin A+B    | 25.94 | 612 | 611 | 611,593,575,539 | (Moghadamtousi et al., 2015) (Bermejo et al., 2005)                           | ✗ | ✓ | ✓ |
| 95  | •Muricin L           | 25.95 | 442 | 441 | 441             | (Moghadamtousi et al., 2015)                                                  | ✗ | ✓ | ✓ |
| 96  | •Muricin-N           | 25.96 | 414 | 415 | 415             | (Moghadamtousi et al., 2015)                                                  | ✓ | ✓ | ✓ |
| 97  | •Epoxymurin A,B      | 25.97 | 530 | 529 | 529,292,152     | (Moghadamtousi et al., 2015)(Bermejo et al., 2005), (Zafra-Polo et al., 1996) | ✓ | ✓ | ✓ |
| 98  | •Sabadelin           | 26.13 | 530 | 529 | 529,292,152     | (Moghadamtousi et al., 2015),(Bermejo et al., 2005)                           | ✓ | ✓ | ✓ |
| 99  | •Murihexol           | 26.19 | 614 | 615 | 614,578         | (Moghadamtousi et al., 2015), (Bermejo et al., 2005).                         | ✗ | ✓ | ✓ |
| 100 | •Donhexocin          | 26.22 | 614 | 615 | 614,578         | (Moghadamtousi et al., 2015).                                                 | ✗ | ✓ | ✓ |
| 101 | ••Squamocin I/K      | 26.23 | 578 | 579 | 579,561,543,507 | (Zafra-Polo et al., 1996), (Gu et al., 1997b)                                 | ✓ | ✗ | ✓ |
| 102 | •Anohexocin          | 26.26 | 628 | 629 | 629,611,593,575 | (Moghadamtousi et al., 2015), (Bermejo et al., 2005)                          | ✓ | ✓ | ✓ |
| 103 | •Squamocin           | 26.27 | 622 | 623 | 510,320,390,392 | (Le Ven et al., 2014),(Jacobo-Herrera et al., 2019)                           | ✓ | ✓ | ✓ |
| 104 | •Murihexocin A       | 26.38 | 628 | 629 | 629,611,593,575 | (Moghadamtousi et al., 2015), (Bermejo et al., 2005)                          | ✓ | ✓ | ✓ |
| 105 | •Murihexocin B       | 26.46 | 628 | 629 | 629,611,593,575 | (Moghadamtousi et al., 2015), (Bermejo et al., 2005)                          | ✓ | ✓ | ✓ |
| 106 | •Cis-uvariamicin I   | 26.48 | 592 | 593 | 593,755         | (Moghadamtousi et al., 2015), (Bermejo et al., 2005)                          | ✓ | ✓ | ✓ |
| 107 | •Cis-uvariamicin IV  | 26.61 | 592 | 593 | 593,755         | (Moghadamtousi et al., 2015), (Bermejo et al., 2005)                          | ✓ | ✓ | ✓ |
| 108 | •Muricatenol         | 26.62 | 608 | 609 | 609,590,554     | (Moghadamtousi et al., 2015), (Bermejo et al., 2005).                         | ✓ | ✓ | ✓ |

|     |                                    |       |     |     |                     |                                                         |   |   |   |
|-----|------------------------------------|-------|-----|-----|---------------------|---------------------------------------------------------|---|---|---|
| 109 | *Cis-uvariamicin II                | 26.64 | 592 | 593 | 593,755             | (Moghadamtousi et al., 2015), (Bermejo et al., 2005)    | ✓ | ✓ | ✓ |
| 110 | *16,19-cis murisolin               | 26.72 | 580 | 581 | 581,527,509         | (Moghadamtousi et al., 2015), (Bermejo et al., 2005).   | ✓ | × | ✓ |
| 111 | *Murihexocin C                     | 26.70 | 628 | 629 | 629,611,593,575     | (Moghadamtousi et al., 2015), (Bermejo et al., 2005)    | ✓ | ✓ | ✓ |
| 112 | ***Asimilobin                      | 26.76 | 578 | 579 | 579,561,543,507     | (Avula et al., 2018)                                    | ✓ | × | ✓ |
| 113 | *Muricin-H                         | 26.79 | 580 | 581 | 581,527,509         | (Moghadamtousi et al., 2015), (Bermejo et al., 2005).   | ✓ | × | ✓ |
| 114 | *Muricin C                         | 26.86 | 596 | 597 | 597,579,661         | (Moghadamtousi et al., 2015), (Bermejo et al., 2005).   | ✓ | ✓ | ✓ |
| 115 | *Muricin F                         | 26.97 | 594 | 593 | 577,559,541,523     | (Moghadamtousi et al., 2015), (Bermejo et al., 2005)    | ✓ | ✓ | ✓ |
| 116 | *Muricin G                         | 27.17 | 594 | 593 | 577,559,541,523     | (Moghadamtousi et al., 2015), (Bonneau et al., 2017)    | ✓ | ✓ | ✓ |
| 117 | *Annomuricatin A                   | 27.26 | 558 | 559 | 559                 | (Moghadamtousi et al., 2015).                           | ✓ | ✓ | ✓ |
| 118 | *Muricatatin                       | 27.35 | 614 | 615 | 614,578             | (Bermejo et al., 2005).                                 | × | ✓ | ✓ |
| 119 | *Annomuricatin C                   | 27.35 | 558 | 559 | 559                 | (Moghadamtousi et al., 2015)                            | ✓ | ✓ | ✓ |
| 120 | *Reticulatacin                     | 27.36 | 592 | 593 | 593,755             | (Moghadamtousi et al., 2015), (Bermejo et al., 2005)    | ✓ | ✓ | ✓ |
| 121 | *Corrosolin                        | 27.73 | 580 | 581 | 468,336             | (Moghadamtousi et al., 2015),(Bermejo et al., 2005).    | ✓ | × | ✓ |
| 122 | *Chatenaytrienin-1                 | 27.79 | 512 | 511 | 511,457             | (Moghadamtousi et al., 2015),(Bermejo et al., 2005).    | ✓ | ✓ | ✓ |
| 123 | *** Isomurisolenin                 | 27.80 | 578 | 579 | 579,561,543,507     | (Avula et al., 2018)                                    | ✓ | × | ✓ |
| 124 | *Muricoreacin                      | 27.87 | 628 | 629 | 629,611,593,575     | (Moghadamtousi et al., 2015), (Bermejo et al., 2005)    | ✓ | ✓ | ✓ |
| 125 | **Annonisin                        | 28.17 | 610 | 609 | 498,426,324         | (Le Ven et al., 2014)                                   | ✓ | ✓ | ✓ |
| 126 | *Panatellin                        | 28.58 | 564 | 563 | 563                 | (Moghadamtousi et al., 2015)                            | × | × | ✓ |
| 127 | *Cis-annomontacin                  | 28.59 | 624 | 623 | 623,587             | (Moghadamtousi et al., 2015), (Avula et al., 2018)      | ✓ | ✓ | ✓ |
| 128 | *Bullatalacin                      | 28.61 | 622 | 623 | 510,336,408         | (Le Ven et al., 2014),(Jacobo-Herrera et al., 2019)     | ✓ | ✓ | ✓ |
| 129 | *Xylomaticin                       | 28.87 | 624 | 623 | 623                 | (Moghadamtousi et al., 2015)                            | ✓ | ✓ | ✓ |
| 130 | *2,4(cis/trans)-10-R-annocin-A-one | 28.93 | 596 | 597 | 597,579,661         | (Moghadamtousi et al., 2015), (Bermejo et al., 2005).   | ✓ | ✓ | ✓ |
| 131 | *Annomontacin                      | 28.97 | 624 | 623 | 623,605,589         | (Moghadamtousi et al., 2015)                            | ✓ | ✓ | ✓ |
| 132 | *Montancin-A                       | 28.99 | 640 | 639 | 639,567,550         | (Champy et al., 2009),(Avula et al., 2018)              | ✓ | × | ✓ |
| 133 | *Chatenaytrienin-2                 | 29.09 | 512 | 511 | 511,457             | (Moghadamtousi et al., 2015).                           | ✓ | ✓ | ✓ |
| 134 | *Iso-annonacin                     | 29.29 | 596 | 597 | 597,579,661         | (Moghadamtousi et al., 2015), (Rupprecht et al., 1990). | ✓ | ✓ | ✓ |
| 135 | *Asmicin                           | 29.33 | 622 | 623 | 510,320,392,390     | (Le Ven et al., 2014),(Gomes et al., 2019)              | ✓ | ✓ | ✓ |
| 136 | *Gigantetronenin                   | 29.50 | 622 | 623 | 623,,605,,587,551   | (Moghadamtousi et al., 2015)                            | ✓ | ✓ | ✓ |
| 137 | *Annocatalin                       | 29.60 | 596 | 597 | 597,579,661         | (Moghadamtousi et al., 2015).                           | ✓ | ✓ | ✓ |
| 138 | ***Asitrilobin A/C/D               | 30.01 | 624 | 623 | 623,587             | (Avula et al., 2018)                                    | ✓ | ✓ | ✓ |
| 139 | *2,4 cis-isoannonacin              | 30.04 | 596 | 597 | 597,579,661         | (Moghadamtousi et al., 2015).                           | ✓ | ✓ | ✓ |
| 140 | *Epumurin A                        | 30.05 | 532 | 533 | 531,295,277,237     | (Melot et al., 2009)                                    | ✓ | ✓ | ✓ |
| 141 | **Rollidecin- C                    | 30.07 | 578 | 579 | 579,409,380,309,241 | (Gu et al., 1997a)                                      | ✓ | × | ✓ |

|     |                             |       |     |     |                 |                                                      |   |   |   |
|-----|-----------------------------|-------|-----|-----|-----------------|------------------------------------------------------|---|---|---|
| 142 | *Annopentocin C             | 30.10 | 612 | 611 | 611,593,575,539 | (Moghadamtousi et al., 2015, Bermejo et al., 2005)   | × | ✓ | ✓ |
| 143 | *Muricin M                  | 30.11 | 422 | 441 | 441             | (Moghadamtousi et al., 2015)                         | × | ✓ | ✓ |
| 144 | *Annomuricinone D           | 30.13 | 612 | 611 | 611,593,575,539 | (Bermejo et al., 2005)                               | × | ✓ | ✓ |
| 145 | *longifolicin               | 30.18 | 580 | 581 | 527,509         | (Moghadamtousi et al., 2015),(Bermejo et al., 2005). | ✓ | × | ✓ |
| 146 | **Annoglaxin                | 30.40 | 610 | 609 | 498,426,324     | (Bermejo et al., 2005)                               | ✓ | ✓ | ✓ |
| 147 | *2,4 trans-isoannonacin     | 30.67 | 596 | 597 | 597,579,661     | (Moghadamtousi et al., 2015).                        | ✓ | ✓ | ✓ |
| 148 | *2,4 cis-gigantetrocinone   | 30.83 | 596 | 597 | 597,579,661     | (Moghadamtousi et al., 2015).                        | ✓ | ✓ | ✓ |
| 149 | **Annomontanin C            | 31.01 | 610 | 609 | 498,426,324     | (Bermejo et al., 2005)                               | ✓ | ✓ | ✓ |
| 150 | *2,4 trans-gigantetrocinone | 31.25 | 596 | 597 | 597,579,661     | (Moghadamtousi et al., 2015).                        | ✓ | ✓ | ✓ |

\*Compounds previously identified in *Annona muricata*

\*\*Compounds identified for the first time in *Annona muricata*

\*\*\*Compounds identified for the first time in *Annona* genus

♠ E: Ethanol extract of the whole fruit , W: Water extract of the edible part of the fruit , C: Aqueous extract of the leaves capsule

♠ The yellow highlight refers to the compounds identified only in the aqueous extract of the leaves capsule

♠ The blue highlight refers to the compounds not identified in the aqueous extract of the leaves capsule

**Table S2.** Phytochemical compounds (PIs) detected and characterized in *A. muricata* in the ethanolic extract of fruit , water extract of the edible part of the fruit & aqueous extract of the leaves capsule by using HPLC–ESI -MS/MS in positive and negative ionization modes

| No  | Cpd-name                                       | RT          | Mwt        | M<br>±     | Ms/Ms Fragment         | Ref.                                                | E | W | C |
|-----|------------------------------------------------|-------------|------------|------------|------------------------|-----------------------------------------------------|---|---|---|
| 151 | **Methyl catechol                              | 0.15        | 140        | 141        | 141,140,113,109        | (Rini Vijayan and Raghu, 2019)                      | × | ✓ | ✓ |
| 152 | **Malonyl coumaroyl quinic acid                | 0.27        | 422        | 421        | 421,146                | (Marzouk et al., 2019)                              | ✓ | ✓ | ✓ |
| 153 | **Succinyl-dicaffeoylquinic acid               | 0.41        | 616        | 617        | 617,517,103            | (Abu-Reidah et al., 2015)                           | ✓ | ✓ | ✓ |
| 154 | ✓ <b>Protochatechuic-coumaroyl quinic acid</b> | <b>0.42</b> | <b>474</b> | <b>473</b> | <b>473,338,135</b>     | <b>(Tan et al., 2020)</b>                           | × | ✓ | ✓ |
| 155 | **Trigalloyl-glucose                           | 0.47        | 650        | 651        | 605,479,301,299        | (Mena et al., 2012)                                 | ✓ | ✓ | ✓ |
| 156 | **Digalloyl hexose malic acid                  | 0.70        | 600        | 601        | 601,303,297            | (Abu-Reidah et al., 2015)                           | ✓ | × | ✓ |
| 157 | **Disuccinyl-caffeoylquinic acid               | 0.71        | 554        | 555        | 555,537,353,191        | (Lachowicz et al., 2020)                            | ✓ | × | ✓ |
| 158 | *Dicaffeoyl quinic acid                        | 0.72        | 516        | 515        | 515,354                | (Moghdamtousi et al., 2015)                         | ✓ | × | ✓ |
| 159 | *Feuloulcaffeoyl quinic acid                   | 1.53        | 530        | 529        | 529,180                | (Moghdamtousi et al., 2015)                         | ✓ | ✓ | ✓ |
| 160 | **Diferuloyl-syringic acid                     | 1.70        | 550        | 551        | 550,354,197            | (El-Hawary et al., 2020)                            | ✓ | × | ✓ |
| 161 | ** <b>Sanguisorbic acid dilactone</b>          | <b>0.74</b> | <b>470</b> | <b>471</b> | <b>469,314,301,286</b> | <b>(Lachowicz et al., 2020)</b>                     | × | × | ✓ |
| 162 | **Galloyl-valonic acid bilactone               | 0.80        | 662        | 661        | 469,393,169            | (Abu-Reidah et al., 2015)                           | ✓ | ✓ | ✓ |
| 163 | *3-O-caffeic-quinic acid+ procyantr.           | 0.82        | 578        | 577        | 577,289,,191,179       | (Mancini et al., 2018)                              | ✓ | × | ✓ |
| 164 | ✓ <b>galloyl-quinic acid-rutinoside</b>        | <b>0.91</b> | <b>652</b> | <b>653</b> | <b>563,345,308</b>     | <b>(Abu-Reidah et al., 2015)</b>                    | × | × | ✓ |
| 165 | **Coumaroyl shikimic acid pentoside            | 1.13        | 452        | 453        | 453,321,132            | (Tan et al., 2020)                                  | ✓ | ✓ | ✓ |
| 166 | **Di-caffeic acid                              | 1.14        | 342        | 341        | 341,160,179,280        | (Plazonić et al., 2009)                             | ✓ | ✓ | ✓ |
| 167 | **Caffeoyl shikimic acid                       | 1.15        | 336        | 337        | 336,174,162            | (Kang et al., 2016)                                 | ✓ | × | ✓ |
| 168 | **Malonyl-mono CQA3                            | 1.29        | 440        | 441        | 352,265,173,87         | (Zhang et al., 2007)                                | ✓ | ✓ | ✓ |
| 169 | *Caffeoyl quinic acid (chlorogenic acid)       | 4.00        | 354        | 355        | 355,193                | (Moghdamtousi et al., 2015), (Mancini et al., 2018) | ✓ | ✓ | ✓ |
| 170 | **Absciscic acid-O-hexose-HMG                  | 1.30        | 586        | 587        | 587,482                | (El-Sayed et al., 2017)                             | × | ✓ | ✓ |
| 171 | ** Phenyl acetic acid pentoside                | 1.32        | 268        | 269        | 269,136,133            | (Saftić et al., 2019)                               | ✓ | ✓ | ✓ |
| 172 | * Ferulic acid hexoside                        | 1.33        | 356        | 355        | 356,193,162            | (Moghdamtousi et al., 2015)                         | ✓ | ✓ | ✓ |
| 173 | **Coumaric acid hexoside drv.                  | 1.47        | 422        | 421        | 421,164                | (Boukhalkhal et al., 2020)                          | ✓ | ✓ | ✓ |
| 174 | ** Caffeic acid hexose                         | 1.52        | 342        | 341        | 341,179                | (Rini Vijayan and Raghu, 2019)                      | ✓ | ✓ | ✓ |

|     |                                                    |             |            |            |                    |                                                            |          |          |          |
|-----|----------------------------------------------------|-------------|------------|------------|--------------------|------------------------------------------------------------|----------|----------|----------|
| 175 | **Ellagic acid-rhamnoside                          | 1.70        | 448        | 449        | 302,228            | (Mena et al., 2012)                                        | ✓        | ✗        | ✓        |
| 176 | **Caffeic acid arabinose                           | 1.71        | 312        | 313        | 312,179            | (Oliveira-Alves et al., 2017)                              | ✓        | ✓        | ✓        |
| 177 | **Ellagic acid-hexose                              | 1.72        | 464        | 465        | 301,300            | (Yisimayili et al., 2019)                                  | ✗        | ✓        | ✓        |
| 178 | **Galloyl HHDP-gluconate                           | 1.74        | 650        | 651        | 497,301,257,229    | (Mena et al., 2012)                                        | ✓        | ✓        | ✓        |
| 179 | **Protocatechuic acid glucoside                    | 2.01        | 316        | 315        | 315,153            | (Jiménez-González et al., 2018)                            | ✓        | ✓        | ✓        |
| 180 | **Ferulic acid arabinose                           | 2.03        | 326        | 325        | 193,177,149,134    | (Oliveira-Alves et al., 2017)                              | ✓        | ✓        | ✓        |
| 181 | *Coumaric acid glucoside                           | 2.04        | 326        | 325        | 325,249,165        | (Moghadamtousi et al., 2015)                               | ✓        | ✓        | ✓        |
| 182 | **Coumaric acid-rhamnose                           | 2.05        | 310        | 309        | 309,146            | (Rini Vijayan and Raghu, 2019)                             | ✓        | ✓        | ✓        |
| 183 | **Syringic acid pentoside                          | 2.07        | 330        | 331        | 331,198,133        | (Tan et al., 2020)                                         | ✓        | ✓        | ✓        |
| 184 | **Dimer of tergallic acid-hexose                   | 2.08        | 632        | 633        | 451,301,299        | (Lantzouraki et al., 2015)                                 | ✓        | ✗        | ✓        |
| 185 | *Caffeic acid                                      | 2.09        | 180        | 179        | 179                | (Coria-Téllez et al., 2019)                                | ✓        | ✓        | ✓        |
| 186 | *Quinic acid                                       | 2.28        | 192        | 193        | 193,173,129,113    | (Larrazábal-Fuentes et al., 2020)                          | ✓        | ✓        | ✓        |
| 187 | *Gallic acid                                       | 2.46        | 170        | 169        | 169,152            | (Moghadamtousi et al., 2015), (Coria-Téllez et al., 2019). | ✗        | ✓        | ✓        |
| 188 | *Citric acid                                       | 2.54        | 192        | 193        | 104,85             | (Cristofori et al., 2011)                                  | ✓        | ✓        | ✓        |
| 189 | *Ellagic acid                                      | 2.69        | 302        | 303        | 285,275,229        | (Souza et al., 2018),(Obob et al., 2015)                   | ✓        | ✓        | ✓        |
| 190 | **Shikimic acid hexoside                           | <b>2.75</b> | 336        | 337        | 336,174,162        | (Kang et al., 2016)                                        | ✓        | ✗        | ✓        |
| 191 | **Shikimic acid                                    | 2.76        | 174        | 175        | 175,174(100%),131  | (Marzouk et al., 2019)                                     | ✓        | ✓        | ✓        |
| 192 | **Sinapic acid drv.                                | 2.80        | 436        | 437        | 437,224            | (Tan et al., 2020)                                         | ✓        | ✓        | ✓        |
| 193 | **Caffeoyl-shikimic acid drv.                      | 2.84        | 586        | 587        | 387,336            | (Simirgiotis et al., 2017)                                 | ✗        | ✓        | ✓        |
| 194 | **Caftaric acid                                    | 2.90        | 312        | 313        | 313,179            | (Tan et al., 2020)                                         | ✓        | ✓        | ✓        |
| 195 | **Hibiscus acid                                    | 3.05        | 190        | 191        | 191                | (Izquierdo-Vega et al., 2020)                              | ✓        | ✗        | ✓        |
| 196 | *p-coumaric acid                                   | 3.06        | 164        | 165        | 164,146            | (Adesanwo et al., 2020) ,(George et al., 2015)             | ✓        | ✓        | ✓        |
| 197 | *p-coumaric acid-methyl ether                      | <b>3.09</b> | 178        | 179        | 179,165            | ((Moghadamtousi et al., 2015)                              | ✓        | ✓        | ✓        |
| 198 | <b>**mucic acid-kaempferol-malic acid-rhamnose</b> | <b>3.13</b> | <b>740</b> | <b>739</b> | <b>739,547,192</b> | <b>(Abu-Reidah et al., 2015)</b>                           | <b>✗</b> | <b>✗</b> | <b>✓</b> |
| 199 | **Dicafeic acid drv.                               | 3.18        | 616        | 617        | 617,,341           | (Rini Vijayan and Raghu, 2019)                             | ✓        | ✓        | ✓        |
| 200 | **Hydroxyl ferulic acid drv.                       | 3.25        | 318        | 319        | 319,210            | (Tan et al., 2020)                                         | ✓        | ✓        | ✓        |
| 201 | **Ferulic acid drv.                                | 3.27        | 273        | 272        | 272,158,132,125    | (Rini Vijayan and Raghu, 2019)                             | ✓        | ✓        | ✓        |
| 202 | **p-coumaric acid drv.                             | 3.43        | 360        | 361        | 361,214,147,118    | (Saftić et al., 2019)                                      | ✓        | ✓        | ✓        |

|     |                                                                 |       |     |     |                     |                                |   |   |   |
|-----|-----------------------------------------------------------------|-------|-----|-----|---------------------|--------------------------------|---|---|---|
| 203 | ** Gallic acid drv.                                             | 3.70  | 266 | 265 | 265,170             | (Tan et al., 2020)             | ✓ | ✓ | ✓ |
| 204 | **Coumaric acid drv.                                            | 3.82  | 294 | 293 | 293,163             | (Tan et al., 2020)             | ✓ | ✓ | ✓ |
| 205 | **Ellagic acid drv.                                             | 3.92  | 440 | 441 | 441,302             | (Tan et al., 2020)             | ✓ | ✓ | ✓ |
| 206 | ** Gallic acid drv.                                             | 3.93  | 398 | 399 | 399,171             | (Tan et al., 2020)             | × | ✓ | ✓ |
| 207 | **Galloflavin                                                   | 4.06  | 278 | 279 | 279,197             | (Zhang et al., 2018)           | ✓ | × | ✓ |
| 208 | **Trigalloy llevoglucosan                                       | 4.07  | 618 | 619 | 619,153,109         | (Abu-Reidah et al., 2015)      | ✓ | ✓ | ✓ |
| 209 | **galloyl pyrogallol drv.                                       | 4.43  | 358 | 357 | 358,277             | (Abu-Reidah et al., 2015)      | × | × | ✓ |
| 210 | ** Hibiscus acid drv.                                           | 4.44  | 308 | 309 | 309,172             | (Tan et al., 2020)             | ✓ | × | ✓ |
| 211 | ** Di-O-galloyl-HHDD protoquercitol I                           | 5.09  | 618 | 619 | 301                 | (Abu-Reidah et al., 2015)      | ✓ | ✓ | ✓ |
| 212 | ** Quinic acid drv.                                             | 5.49  | 330 | 331 | 331,193,175         | (Tan et al., 2020)             | ✓ | ✓ | ✓ |
| 213 | ** Maclurin-3-O-glucoside                                       | 5.77  | 424 | 425 | 353,341,329,287,261 | (Beelders et al., 2014)        | ✓ | × | ✓ |
| 214 | ** Malic acid hexose drv.                                       | 5.80  | 436 | 437 | 437,348,297         | (Abu-Reidah et al., 2015)      | ✓ | ✓ | ✓ |
| 215 | ** Caffeic acid drv.                                            | 6.70  | 378 | 377 | 377,179(100%)       | (Bystrom et al., 2008)         | ✓ | ✓ | ✓ |
| 216 | **Maclurin drv.                                                 | 6.99  | 360 | 361 | 361,262             | (Beelders et al., 2014)        | ✓ | ✓ | ✓ |
| 217 | **Muclurin drv.                                                 | 7.03  | 380 | 381 | 381,262             | (Beelders et al., 2014)        | ✓ | ✓ | ✓ |
| 218 | ** Gallic-malic acid drv.                                       | 7.07  | 398 | 399 | 399,286             | (Abu-Reidah et al., 2015)      | × | ✓ | ✓ |
| 219 | **Hibiscus acid drv.                                            | 7.09  | 452 | 453 | 453,190             | (Tan et al., 2020)             | ✓ | ✓ | ✓ |
| 220 | **digallic acid drv.                                            | 7.17  | 378 | 377 | 377,322(100%)       | (Abu-Reidah et al., 2015)      | × | × | ✓ |
| 221 | ** Ferulic acid drv.                                            | 7.29  | 382 | 383 | 383,206,149,134     | (Kammerer et al., 2004)        | ✓ | ✓ | ✓ |
| 222 | *catechin drv.+caffeic acid drv.                                | 7.30  | 470 | 471 | 471,289,179,135     | (Mancini et al., 2018)         | × | × | ✓ |
| 223 | *Eugenol                                                        | 7.49  | 164 | 165 | 165                 | (Adesanwo et al., 2020)        | ✓ | ✓ | ✓ |
| 224 | ** Hydroxyl citric acid drv.                                    | 8.43  | 336 | 337 | 336,192             | (Falcão et al., 2013)          | ✓ | × | ✓ |
| 225 | **Ellagitannin                                                  | 8.80  | 785 | 786 | 618,302,277,251     | (Nuncio-Jáuregui et al., 2015) | × | ✓ | ✓ |
| 226 | **Brevifolin                                                    | 9.30  | 248 | 249 | 249,219,191         | (Yisimayili et al., 2019)      | × | ✓ | ✓ |
| 227 | **Caftaric acid drv.                                            | 9.38  | 668 | 669 | 312                 | (Abu-Reidah et al., 2015)      | ✓ | ✓ | ✓ |
| 228 | **Tetramethyl benzoic acid                                      | 10.15 | 178 | 179 | 179,150,122         | (Adesanwo et al., 2020)        | ✓ | ✓ | ✓ |
| 229 | **Catechin-drv.                                                 | 10.89 | 398 | 399 | 399,290             | (Tan et al., 2020)             | × | ✓ | ✓ |
| 230 | *6-(benzyloxy)-methyl-2,3,4, tri-methyl cyclohexyl formaldehyde | 11.58 | 274 | 275 | 275                 | (Adesanwo et al., 2020)        | ✓ | ✓ | ✓ |
| 231 | *Allyl pyrocatecol-diacetate                                    | 12.0  | 234 | 235 | 235                 | (Adesanwo et al., 2020)        | ✓ | ✓ | ✓ |

|     |                                  |       |     |     |                     |                            |   |   |   |
|-----|----------------------------------|-------|-----|-----|---------------------|----------------------------|---|---|---|
| 232 | **Ellagitannin I,II              | 12.01 | 644 | 645 | 301,283,257,193     | (Lantzouraki et al., 2015) | ✓ | × | ✓ |
| 233 | **9-COA                          | 13.05 | 398 | 399 | 399,220,206,179,135 | (Zhang et al., 2007)       | × | ✓ | ✓ |
| 234 | ** Iriflophenone-3-C- glucoside  | 13.36 | 408 | 409 | 409,273,220,120     | (Beelders et al., 2014)    | ✓ | × | ✓ |
| 235 | **Galloylpyrogallol              | 13.79 | 278 | 279 | 279,153             | (Abu-Reidah et al., 2015)  | ✓ | × | ✓ |
| 236 | **Galloyl arbutin                | 15.17 | 424 | 425 | 273                 | (Abu-Reidah et al., 2015)  | ✓ | × | ✓ |
| 237 | **Galloylpyrogallol drv.         | 15.49 | 436 | 437 | 437,279             | (Abu-Reidah et al., 2015)  | ✓ | ✓ | ✓ |
| 238 | **Methylester of lignoceric acid | 19.38 | 382 | 383 | 383                 | (Ibrahim, 2012)            | ✓ | ✓ | ✓ |
| 239 | ** Methyl corilagin              | 21.95 | 648 | 647 | 649,634,301         | (Yisimayili et al., 2019)  | ✓ | ✓ | ✓ |
| 240 | ** Dimethyl-corilagin            | 22.24 | 662 | 661 | 661,649,634,301     | (Yisimayili et al., 2019)  | ✓ | ✓ | ✓ |
| 241 | **Dihydroisovalerate             | 30.15 | 424 | 425 | 425,365,281         | (Abu-Reidah et al., 2015)  | ✓ | × | ✓ |

\*Compounds previously identified in *Annona muricata*

\*\*Compounds identified for the first time in *Annona muricata* & *annona* genus

✓ New compounds identified in *Annona muricata*

**HMG**= 3- hydroxyl-3-methyl glutary, **CQA**= moncaffeoylquinic acid(chlorogenic acid), **COA**= caffeoyl-2,7-anhydro-2- octulopyranosonic acid

♠ E: Ethanol extract of the whole fruit , W: Water extract of the edible part of the fruit , C: Aqueous extract of the leaves capsule

♠ The yellow highlight refers to the compounds identified only in the aqueous extract of the leaves capsule

♠ The red colored lines refers to the new compounds identified in *A. muricata* in the ethanolic extract of fruit , water extract of the edible part of the fruit & aqueous extract of the leaves capsule

**Table S3.** Phytochemical compounds (Fls) detected and characterized *A. muricata* in the ethanolic extract of fruit , water extract of the edible part of the fruit & aqueous extract of the leaves capsule by using HPLC–ESI -MS/MS in positive and negative ionization modes

| No  | Cpd-name                                        | Rt    | Mwt | M<br>± | Ms/Ms Fragment                      | Ref.                                          | E | W | C |
|-----|-------------------------------------------------|-------|-----|--------|-------------------------------------|-----------------------------------------------|---|---|---|
| 242 | **Malonylated-luteolin-O-xylose-glucose         | 3.95  | 668 | 669    | 699,537,132                         | (El Sayed et al., 2016)                       | ✓ | ✓ | ✓ |
| 243 | **Apigenin-pentosyl-(hydroxyferuloyl)-pentoside | 6.28  | 726 | 725    | 533,595,325,402,271                 | (Benayad et al., 2014)                        | ✓ | ✓ | ✓ |
| 244 | **cyanidine-acetylglucoside pyruvic acid        | 6.61  | 559 | 558    | 558,359                             | (He et al., 2012)                             | ✗ | ✗ | ✓ |
| 245 | **Luteolin-O-caffeoylglucoside                  | 6.72  | 610 | 609    | 609,180                             | (Gu et al., 2012)                             | ✓ | ✓ | ✓ |
| 246 | **Acacetin-hexose-hexose-glucouronic acid       | 6.75  | 784 | 785    | 785,608,447,338,284,240,211,176,162 | (Gu et al., 2012)                             | ✓ | ✓ | ✓ |
| 247 | **chrysoeriol-7-O-glucouronyl-glucouronic acid  | 7.07  | 652 | 653    | 653,602,351,301                     | (Marczak et al., 2016)                        | ✗ | ✗ | ✓ |
| 248 | **Quercetin hexose-malic acid                   | 7.85  | 580 | 581    | 463,301                             | (Abu-Reidah et al., 2015)                     | ✓ | ✗ | ✓ |
| 249 | **Myricetin-galloyl-pentose                     | 8.26  | 602 | 603    | 319,132,171                         | (Saldanha et al., 2013)                       | ✓ | ✗ | ✓ |
| 250 | **Myricetin-rhamnose malic acid                 | 8.29  | 580 | 581    | 581,463,316,301                     | (Abu-Reidah et al., 2015)                     | ✓ | ✗ | ✓ |
| 251 | **Kaempferol-gallic acid hexose                 | 8.59  | 600 | 601    | 601,438,163                         | (Abdel-Hameed et al., 2013)                   | ✓ | ✗ | ✓ |
| 252 | **Myricetin-galloyl-hexose                      | 9.98  | 632 | 633    | 317                                 | (Abu-Reidah et al., 2015)                     | ✓ | ✗ | ✓ |
| 253 | **Velutin-galloyl hexoside                      | 10.11 | 646 | 645    | 645,332,314                         | (Abu-Reidah et al., 2015), (Tan et al., 2020) | ✓ | ✓ | ✓ |
| 254 | **Delphinidin- <i>p</i> -coumaroyl hexose       | 10.84 | 611 | 612    | 611,303                             | (Šuković et al., 2020)                        | ✗ | ✓ | ✓ |
| 255 | ✓Dihydromyricetin galloyl hexoside              | 10.92 | 634 | 635    | 635,320,162,152                     | (Tan et al., 2020)                            | ✓ | ✗ | ✓ |
| 256 | **Dihydroxy galocatechin                        | 11.07 | 342 | 341    | 341,305                             | (Ambigaipalan et al., 2016)                   | ✓ | ✓ | ✓ |
| 257 | ✓Apigenin-gallate                               | 11.14 | 422 | 421    | 421,170,151                         | (Tan et al., 2020)                            | ✓ | ✓ | ✓ |
| 258 | *quercetin-rhamnose-sophoroside                 | 11.70 | 756 | 757    | 757,308,302,146                     | (Moghadamtousi et al., 2015)                  | ✗ | ✗ | ✓ |
| 259 | *kaempferol-3-O-glucose-rhamnose-glucoside      | 11.81 | 756 | 757    | 755,448,470                         | (Moghadamtousi et al., 2015)                  | ✗ | ✗ | ✓ |
| 260 | *Quercetin-hexoside-rhamnoside-pentose          | 12.07 | 742 | 743    | 743,308,303                         | (Mancini et al., 2018)                        | ✓ | ✓ | ✓ |
| 261 | **Dihydrokaempferol-rhamnoside - hexose-pentose | 12.25 | 728 | 727    | 727,288,294                         | (Martucci et al., 2014)                       | ✗ | ✓ | ✓ |

|     |                                                     |              |            |            |                             |                                                      |   |   |   |
|-----|-----------------------------------------------------|--------------|------------|------------|-----------------------------|------------------------------------------------------|---|---|---|
| 262 | ✓ <b>Dihydromyricetin-hexouronic acid-hexoside</b>  | <b>12.36</b> | <b>658</b> | <b>657</b> | <b>657,319,176</b>          | <b>(Tan et al., 2020)</b>                            | ✓ | ✗ | ✓ |
| 263 | •• Kaempferol/luteolin-O-pentose-O-glucouronic acid | 12.40        | 594        | 593        | 593,417,285,176             | (Al-Yousef et al., 2020),(Abdel-Hameed et al., 2013) | ✓ | ✓ | ✓ |
| 264 | •• Delphinidin-3- <i>p</i> -coumaroyl-glucose-driv. | <b>13.00</b> | 727        | 728        | 728,611,449,278,162,146,116 | (Flamini, 2013)                                      | ✓ | ✓ | ✓ |
| 265 | •• Malvidin-3- <i>p</i> -coumaroyl-glucose-driv.    | 13.03        | 785        | 786        | 639,477,454,308,162,146     | (Flamini, 2013)                                      | ✗ | ✓ | ✓ |
| 266 | •• Delphinidine-3-O-(6-O-acetyl)-5-O-diglucoside    | 13.15        | 669        | 670        | 345                         | (Flamini, 2013)                                      | ✗ | ✓ | ✓ |
| 267 | • Quercetin-pentose-rhamnose                        | <b>13.16</b> | 580        | 581        | 302,265,150                 | (Mancini et al., 2018)                               | ✓ | ✗ | ✓ |
| 268 | •• Naringenin-7-O-rutinoside                        | 13.20        | 580        | 581        | 271,177,151                 | (Abu-Reidah et al., 2015)                            | ✓ | ✗ | ✓ |
| 269 | • Rutin(querctetin-rutinoside)                      | 13.35        | 610        | 609        | 609,301                     | (Moghadamtousi et al., 2015)                         | ✓ | ✓ | ✓ |
| 270 | ••Diosmetin-pentose-glucoside                       | 13.61        | 594        | 593        | 593,300                     | (Hassan et al., 2019)                                | ✓ | ✓ | ✓ |
| 271 | •• Acetyl chrysophanol-O-glucose-xylose             | 13.62        | 590        | 591        | 591,297,253,133             | (Zhao et al., 2013)                                  | ✓ | ✗ | ✓ |
| 272 | •• Apigenin-6- <i>C</i> -acetyl-rhamnoside-glucose  | 13.77        | 620        | 621        | 559,455,293                 | (Ozarowski et al., 2018)                             | ✗ | ✓ | ✓ |
| 273 | • Kaempferol/ luteolin-O-rutinoside                 | 13.75        | 594        | 593        | 593,431,285                 | (Moghadamtousi et al., 2015) ,(Mancini et al., 2018) | ✓ | ✓ | ✓ |
| 274 | •Quercetin-di-glucoside                             | 13.59        | 626        | 627        | 627,303                     | (Mancini et al., 2018)                               | ✓ | ✓ | ✓ |
| 275 | •• Acyl quercetin-rhamnose-glucose                  | 13.81        | 650        | 651        | 607,485,407,302,162         | (Ben Said et al., 2017)                              | ✓ | ✓ | ✓ |
| 276 | • Kaempferol-O-robinobioside                        | 14.12        | 594        | 593        | 593,285                     | (Moghadamtousi et al., 2015)                         | ✓ | ✓ | ✓ |
| 277 | •• Luteolin/ kaempferol-diglucoside                 | 14.23        | 610        | 609        | 609,285                     | (Gu et al., 2012)                                    | ✓ | ✓ | ✓ |
| 278 | •• Methyl-kempferol-pentose-hexose                  | 14.43        | 594        | 593        | 593,300,285,228             | (Gu et al., 2012)                                    | ✓ | ✓ | ✓ |
| 279 | ••Naringenin-di-glucoside                           | 14.72        | 596        | 597        | 596,505,272,324             | (Li et al., 2016)                                    | ✓ | ✓ | ✓ |
| 280 | ••Isorhamntein-pentose-hexose                       | 14.95        | 610        | 609        | 609,315,294                 | (El-Hawary et al., 2020)                             | ✓ | ✓ | ✓ |
| 281 | • Quercetin-3-O-neohisposide                        | 15.05        | 610        | 609        | 609,301                     | (Moghadamtousi et al., 2015)                         | ✓ | ✓ | ✓ |
| 282 | • Quercetin-3-O-robinoside                          | 15.11        | 610        | 609        | 609,301                     | (Moghadamtousi et al., 2015)                         | ✓ | ✓ | ✓ |
| 283 | •• Delphinidin-3-O-rutinoside                       | 15.21        | 611        | 612        | 611,465,303                 | (Abdel-Hameed et al., 2013)                          | ✗ | ✓ | ✓ |
| 284 | •• Eriodyctoyl-7-O-rutinoside                       | 15.60        | 596        | 597        | 308,298,163                 | (El-Sayed et al., 2017)                              | ✓ | ✓ | ✓ |
| 285 | •• Orientein-7-O-deoxy hexose                       | 15.63        | 594        | 593        | 594,579,449,300,286         | (Ozarowski et al., 2018)                             | ✓ | ✓ | ✓ |
| 286 | • Homo-orientin                                     | 15.71        | 448        | 449        | 448,286,228                 | (George et al., 2015)                                | ✓ | ✗ | ✓ |
| 287 | •Uercetin-O-rhmnsoside (quercetrin)                 | 16.13        | 448        | 449        | 447,302,146                 | (Souza et al., 2018)                                 | ✓ | ✗ | ✓ |
| 288 | •Dihydrokaempferol-hexoside                         | 16.15        | 450        | 449        | 449,285,162                 | (Moghadamtousi et al., 2015)                         | ✓ | ✗ | ✓ |

|     |                                                |       |     |     |                     |                                                                       |   |   |   |
|-----|------------------------------------------------|-------|-----|-----|---------------------|-----------------------------------------------------------------------|---|---|---|
| 289 | * Kaempferol-O-hexose                          | 16.43 | 448 | 449 | 448,286             | (Mancini et al., 2018)                                                | ✓ | × | ✓ |
| 290 | ** Trihydroxy-6-methoxyflavonone-7-O-glucoside | 16.44 | 464 | 465 | 465,303             | (Lee et al., 2018)                                                    | × | ✓ | ✓ |
| 291 | **Phloretin-O-hexoside                         | 16.60 | 436 | 437 | 437,275,162         | (Mena et al., 2012)                                                   | ✓ | ✓ | ✓ |
| 292 | ** Myricetin-3-O-rhamnoside                    | 16.61 | 464 | 465 | 319,317,300,146     | (Abu-Reidah et al., 2015)                                             | × | ✓ | ✓ |
| 293 | **Apigenin-acetyl glucoside                    | 16.63 | 474 | 473 | 473,270,203         | (Abdelaziz et al., 2020)                                              | × | ✓ | ✓ |
| 294 | ** Kaempferol / luteolin-rhamnose              | 16.76 | 432 | 431 | 431,287(100%)       | (Jiménez-González et al., 2018),<br>(Larrazábal-Fuentes et al., 2020) | ✓ | × | ✓ |
| 295 | **Chryseriol-O-glucoside                       | 16.78 | 462 | 463 | 463,301             | (El-Sayed et al., 2017)                                               | ✓ | ✓ | ✓ |
| 296 | * Quercetin-pentoside                          | 16.78 | 434 | 433 | 433,300             | (Mancini et al., 2018)                                                | ✓ | ✓ | ✓ |
| 297 | * Quercetin-glucose/galactose                  | 16.85 | 464 | 465 | 302                 | (Moghadamtousi et al., 2015), (Mancini et al., 2018)                  | × | ✓ | ✓ |
| 298 | *Dihydrokaempferol-hexoside                    | 16.89 | 450 | 449 | 449,287,270         | (Moghadamtousi et al., 2015)                                          | ✓ | × | ✓ |
| 299 | **3,3',7'-trimethyl-sulfate myricetin          | 17.13 | 440 | 441 | 441,318,123         | (Simirgiotis et al., 2017)                                            | ✓ | ✓ | ✓ |
| 300 | ** Tricetin-4',-O-glucoside                    | 17.37 | 464 | 465 | 303,229,149         | (Yisimayili et al., 2019)                                             | × | ✓ | ✓ |
| 301 | *Epi(catechin)                                 | 17.50 | 290 | 291 | 290,150,136,108     | (Moghadamtousi et al., 2015) ,(Mancini et al., 2018)                  | ✓ | × | ✓ |
| 302 | **Formononetein                                | 17.51 | 268 | 269 | 269                 | (Tan et al., 2020)                                                    | ✓ | ✓ | ✓ |
| 303 | **Tangretin-driv.                              | 17.53 | 740 | 739 | 739,371             | (Coria-Téllez et al., 2019)                                           | × | × | ✓ |
| 304 | **Visidulin III-driv.                          | 17.60 | 740 | 739 | 739,345             | (Wang et al., 2018)                                                   | × | × | ✓ |
| 305 | **Taxifolin-methylether                        | 17.61 | 318 | 319 | 319,257,130         | (Taamalli et al., 2015)                                               | ✓ | ✓ | ✓ |
| 306 | **3',4',7- tri-Hydroxy-flavanone               | 17.77 | 273 | 272 | 226,185,158,111     | (Rini Vijayan and Raghu, 2019)                                        | ✓ | ✓ | ✓ |
| 307 | ** Dimethyl quercetin drv.                     | 17.80 | 616 | 617 | 617,330             | (Tan et al., 2020)                                                    | ✓ | ✓ | ✓ |
| 308 | *Glycitein                                     | 17.88 | 284 | 283 | 283,266             | (George et al., 2015),88                                              | ✓ | ✓ | ✓ |
| 309 | ** Pinocembrin                                 | 17.95 | 256 | 255 | 255                 | (Wang et al., 2008)                                                   | ✓ | × | ✓ |
| 310 | **Pelargonidin-dimethyl drv.                   | 18.02 | 301 | 302 | 302,300             | (Ben Said et al., 2017)                                               | ✓ | ✓ | ✓ |
| 311 | **Liquiritigenin                               | 18.06 | 256 | 255 | 255                 | (Wang et al., 2008)                                                   | ✓ | × | ✓ |
| 312 | *Tangeretin                                    | 18.57 | 372 | 373 | 373,315,300         | (Adesanwo et al., 2020)                                               | ✓ | × | ✓ |
| 313 | *Diadzein                                      | 18.67 | 254 | 255 | 255,237,211,165,145 | George et al., 2015)                                                  | ✓ | × | ✓ |
| 314 | *Taxifolin                                     | 18.69 | 304 | 303 | 303,178             | George et al., 2015)                                                  | ✓ | × | ✓ |
| 315 | **Methoxytaxifolin                             | 18.35 | 334 | 333 | 333,303,287(100)    | (Bielecka et al., 2021)                                               | ✓ | ✓ | ✓ |
| 316 | **Rhamnetin /isorhamnetin                      | 18.65 | 316 | 315 | 315,300,284,151     | (Jiménez-González et al., 2018)                                       | ✓ | ✓ | ✓ |
| 317 | **Methoxytetrahydroxyisoflavone                | 18.90 | 316 | 315 | 315,272,151         | (Uysal et al., 2021)                                                  | ✓ | ✓ | ✓ |
| 318 | * Kaempferol                                   | 18.93 | 286 | 287 | 259,229,151         | (George et al., 2015), (Obboh et al., 2015)                           | ✓ | ✓ | ✓ |

|     |                                   |       |     |     |                 |                                             |   |   |   |
|-----|-----------------------------------|-------|-----|-----|-----------------|---------------------------------------------|---|---|---|
| 319 | * Luteolin                        | 19.06 | 286 | 287 | 269,243,151     | (George et al., 2015), (Obloh et al., 2015) | ✓ | ✓ | ✓ |
| 320 | **Myricetin                       | 19.12 | 318 | 319 | 319,257,162,102 | (Abu-Reidah et al., 2015)                   | ✓ | ✓ | ✓ |
| 321 | *Genistein                        | 19.15 | 270 | 271 | 271,253,225,215 | (George et al., 2015)                       | ✓ | ✓ | ✓ |
| 322 | **CamellianinA                    | 19.17 | 620 | 621 | 433,313         | (Abu-Reidah et al., 2015)                   | ✗ | ✓ | ✓ |
| 323 | **tri-Hydroxy-methoxy flavone     | 19.24 | 300 | 301 | 301,286         | (Wang et al., 2008)                         | ✓ | ✓ | ✓ |
| 324 | **tri-Hydroxy-tri-methoxy flavone | 19.26 | 360 | 361 | 361,343,283,225 | (Boukhalkhal et al., 2020)                  | ✓ | ✓ | ✓ |
| 325 | **3,5,7-tri-Methoxy flavone       | 19.52 | 312 | 313 | 313,271,236     | (Haq et al., 2020)                          | ✓ | ✓ | ✓ |
| 326 | **Chrysoeriol                     | 19.66 | 300 | 301 | 301,284,268     | (Abu-Reidah et al., 2015)                   | ✓ | ✓ | ✓ |
| 327 | **Methoxy kaempferol-methyl ether | 21.74 | 330 | 331 | 331,285         | (Falcão et al., 2013)                       | ✓ | ✓ | ✓ |
| 328 | * Quercetin                       | 23.03 | 270 | 271 | 271,253         | (Wang et al., 2008)                         | ✓ | ✓ | ✓ |
| 392 | **Apigenin                        | 23.57 | 302 | 303 | 273,229,151     | (George et al., 2015), (Obloh et al., 2015) | ✓ | ✓ | ✓ |
| 330 | *Hesperitin                       | 23.71 | 302 | 303 | 285,267,231     | (George et al., 2015), (Obloh et al., 2015) | ✓ | ✓ | ✓ |

\* Compounds previously identified in *Annona muricata*

\*\*Compounds identified for the first time in *Annona muricata*&*Annona* genus

✓New compounds identified in *Annona muricata*

♠ E: Ethanol extract of the whole fruit , W: Water extract of the edible part of the fruit , C: Aqueous extract of the leaves capsule

♠ The yellow highlight refers to the compounds identified only in the aqueous extract of the leaves capsule

♠ The red colored lines refers to the new compounds identified in *A. muricata* in the ethanolic extract of fruit , water extract of the edible part of the fruit & aqueous extract of the leaves capsule

**Table S4.** Phytochemical compounds(Alks) detected and characterized *A. muricata* in the ethanolic extract of fruit , water extract of the edible part of the fruit & aqueous extract of the leaves capsule by using HPLC–ESI -MS/MS in positive and negative ionization modes

| No  | Cpd-name                                                                      | Rt    | Mwt | M ± | Ms/Ms Fragment          | Ref.                                                     | E | W | C |
|-----|-------------------------------------------------------------------------------|-------|-----|-----|-------------------------|----------------------------------------------------------|---|---|---|
| 331 | *2,4,6-tribromoaniline                                                        | 1.64  | 329 | 330 | 298,172,115             | (Gavamukulya et al., 2019)                               | ✓ | ✓ | ✓ |
| 332 | **Squamolone                                                                  | 4.41  | 128 | 129 | 129,112                 | (Avula et al., 2018)                                     | ✗ | ✗ | ✓ |
| 333 | ***Corydine                                                                   | 5.50  | 341 | 342 | 342,192                 | (Avula et al., 2018)                                     | ✓ | ✗ | ✓ |
| 334 | *Norcoclaurine                                                                | 5.52  | 271 | 272 | 272,255,240,161         | (Avula et al., 2018)                                     | ✗ | ✓ | ✓ |
| 335 | *Coclaurine                                                                   | 5.84  | 285 | 286 | 269,175,108             | (Moghadamtousi et al., 2015) ,(Avula et al., 2018)       | ✓ | ✗ | ✓ |
| 336 | *Reticuline                                                                   | 5.90  | 329 | 330 | 330,191                 | (Moghadamtousi et al., 2015),(Avula et al., 2018)        | ✓ | ✓ | ✓ |
| 337 | *Atherosperminine                                                             | 6.15  | 309 | 310 | 310,295                 | (Moghadamtousi et al., 2015), (Avula et al., 2018)       | ✗ | ✓ | ✓ |
| 338 | **Actinodaphnine                                                              | 6.23  | 311 | 312 | 312,263,235             | (Rinaldi et al., 2017)                                   | ✗ | ✓ | ✓ |
| 339 | *Norushinsunine                                                               | 7.31  | 281 | 282 | 282,265                 | (Avula et al., 2018)                                     | ✓ | ✓ | ✓ |
| 340 | *Anolobine glycoside                                                          | 7.60  | 443 | 442 | 265,247,235,217,162     | (Avula et al., 2018)                                     | ✓ | ✓ | ✓ |
| 341 | *Annonamine                                                                   | 7.77  | 296 | 297 | 297                     | (Moghadamtousi et al., 2015)                             | ✓ | ✓ | ✓ |
| 342 | *Annomuricine                                                                 | 7.85  | 329 | 330 | 331                     | (Moghadamtousi et al., 2015)                             | ✓ | ✓ | ✓ |
| 343 | **Isopiline                                                                   | 8.78  | 297 | 298 | 297,265                 | (Justino et al., 2021)                                   | ✗ | ✗ | ✓ |
| 344 | *Vinblastine                                                                  | 10.29 | 811 | 810 | 810                     | (Rady et al., 2018)                                      | ✗ | ✗ | ✓ |
| 345 | ***Phytosphinguasine                                                          | 16.40 | 317 | 318 | 317,266,260             | (Calixto et al., 2017)                                   | ✓ | ✓ | ✓ |
| 346 | *Methylcoclaurine                                                             | 16.72 | 299 | 300 | 300,277                 | (Moghadamtousi et al., 2015),                            | ✓ | ✓ | ✓ |
| 347 | *N-acetyl tryptamine                                                          | 17.66 | 202 | 203 | 203,175,161,146,135     | (Moghadamtousi et al., 2015)                             | ✓ | ✗ | ✓ |
| 348 | *Dimethyl coclaurine                                                          | 17.71 | 313 | 314 | 314,300,143,107         | (Moghadamtousi et al., 2015)                             | ✓ | ✓ | ✓ |
| 349 | *Stepharine                                                                   | 18.15 | 297 | 298 | 297,146                 | (Moghadamtousi et al., 2015),(Coria-Téllez et al., 2019) | ✗ | ✗ | ✓ |
| 350 | *Coreximine                                                                   | 18.29 | 342 | 341 | 297,282,265,237,222,191 | (Avula et al., 2018)                                     | ✓ | ✓ | ✓ |
| 351 | ***Corytuberine                                                               | 18.83 | 327 | 328 | 328,251                 | (Moghadamtousi et al., 2015),<br>(Avula et al., 2018)    | ✓ | ✓ | ✓ |
| 352 | *Anomurine                                                                    | 18.84 | 327 | 328 | 328,297                 | (Avula et al., 2018)                                     | ✓ | ✓ | ✓ |
| 353 | *Norcorydine                                                                  | 18.87 | 343 | 342 | 342,175                 | (Moghadamtousi et al., 2015),(Avula et al., 2018)        | ✓ | ✗ | ✓ |
| 354 | ***Trans-feruloyl tyramine                                                    | 18.94 | 327 | 328 | 328,192                 | (Moghadamtousi et al., 2015),(Avula et al., 2018)        | ✓ | ✓ | ✓ |
| 355 | ***Trans-caffeoyl tyramine                                                    | 19.17 | 313 | 314 | 314,178                 | (Avula et al., 2018)                                     | ✓ | ✓ | ✓ |
| 356 | *DNJ (deoxynojirmycin)<br>*DMJ(deoxymannojirmycin)<br>*DMDP (dideoxy-imino-D- | 19.24 | 299 | 300 | 254,163                 | (Avula et al., 2018)                                     | ✓ | ✓ | ✓ |

|     |                                                                                                                         |       |     |     |                  |                                                     |   |   |   |
|-----|-------------------------------------------------------------------------------------------------------------------------|-------|-----|-----|------------------|-----------------------------------------------------|---|---|---|
|     | mannitol)                                                                                                               |       |     |     |                  |                                                     |   |   |   |
| 357 | * (4-chlorophenyl)-[4-(3-chlorophenyl)2-[(z)-3-(dimethylamino)prop-1-eyl]quinolin-6-yl]-3-methylimidazol-4-yl) methanol | 19.22 | 163 | 164 | 164              | (Adesanwo et al., 2020)                             | ✓ | ✗ | ✓ |
| 358 | *Annonaine                                                                                                              | 19.35 | 543 | 544 | 543              | (Gavamukulya et al., 2019)                          | ✓ | ✗ | ✓ |
| 359 | *Nuciferine                                                                                                             | 20.85 | 266 | 265 | 266,265,249,219  | (Moghadamtousi et al., 2015),(Justino et al., 2021) | ✓ | ✗ | ✓ |
| 360 | *Xylopine                                                                                                               | 21.61 | 295 | 296 | 297,246,234      | (Moghadamtousi et al., 2015),(Justino et al., 2021) | ✗ | ✓ | ✓ |
| 361 | **Nornuciferine                                                                                                         | 22.02 | 295 | 296 | 296,281,246      | (Moghadamtousi et al., 2015),                       | ✗ | ✓ | ✓ |
| 362 | *Anolobine                                                                                                              | 24.26 | 281 | 282 | 282,236,212,174  | (Avula et al., 2018)                                | ✓ | ✓ | ✓ |
| 363 | ***Muricinine                                                                                                           | 24.66 | 281 | 282 | 282,265,235      | (Avula et al., 2018)                                | ✓ | ✗ | ✓ |
| 364 | ***Pronuciferine                                                                                                        | 24.68 | 313 | 314 | 298,163          | (Avula et al., 2018)                                | ✓ | ✓ | ✓ |
| 365 | *Isolaureline                                                                                                           | 25.37 | 311 | 312 | 312,266          | (Avula et al., 2018)                                | ✓ | ✓ | ✓ |
| 366 | **Nordextromethorphan                                                                                                   | 26.62 | 309 | 310 | 310,279          | (Moghadamtousi et al., 2015), (Avula et al., 2018)  | ✗ | ✓ | ✓ |
| 367 | ***Corydalmine                                                                                                          | 26.93 | 257 | 256 | 256              | (Adesanwo et al., 2020)                             | ✓ | ✓ | ✓ |
| 368 | ***Corytenchine                                                                                                         | 27.80 | 341 | 342 | 342,265          | (Avula et al., 2018)                                | ✓ | ✗ | ✓ |
| 369 | ***Magnoflorinedrv.                                                                                                     | 28.77 | 341 | 342 | 192,165          | (Avula et al., 2018)                                | ✓ | ✗ | ✓ |
| 370 | ***Dimethylcocloraurinedrv.                                                                                             | 28.97 | 432 | 431 | 431,342(100%),89 | (Avula et al., 2018)                                | ✓ | ✗ | ✓ |
| 371 | *Coreximine                                                                                                             | 30.11 | 380 | 381 | 381,313          | (Moghadamtousi et al., 2015)                        | ✓ | ✓ | ✓ |

\* Compounds previously identified in *Annona muricata*

\*\*Compounds identified for the first time in *Annona muricata*

\*\*\*Compounds identified for the first time in *Annona* genus

♠ E: Ethanol extract of the whole fruit , W: Water extract of the edible part of the fruit , C: Aqueous extract of the leaves capsule

♠ The yellow highlight refers to the compounds identified only in the aqueous extract of the leaves capsule

**Table S5.** Phytochemical compounds (miscellaneous) detected and characterized *A. muricata* in the ethanolic extract of fruit , water extract of the edible part of the fruit & aqueous extract of the leaves capsule by using HPLC–ESI-MS/MS in positive and negative ionization modes

| No  | Cpd-name                                             | Type    | Rt    | Mwt | M ± | Ms/Ms Fragment      | Ref.                              | E | W | C |
|-----|------------------------------------------------------|---------|-------|-----|-----|---------------------|-----------------------------------|---|---|---|
| 372 | *** Sucrose                                          | Suger   | 0.80  | 342 | 341 | 179,161,119,113,131 | (Friščić et al., 2016)            | ✓ | ✓ | ✓ |
| 373 | ***Glucourinoids                                     | sugers  | 5.14  | 630 | 631 | 547,375,,483,146    | (El Sayed et al., 2016)           | ✓ | × | ✓ |
| 374 | *** Tyrosine                                         | AA      | 5.62  | 181 | 180 | 180,146,117         | (Beelders et al., 2014)           | ✓ | ✓ | ✓ |
| 375 | ***Secoisolariresinol                                | Ph.pro  | 7.58  | 362 | 361 | 362,178             | (Mena et al., 2012)               | ✓ | ✓ | ✓ |
| 376 | **7- <i>O</i> -methyl oleoresin-pentacetate          | Ess.oil | 8.62  | 617 | 618 | 618,582,516,393,147 | (El Sayed et al., 2016)           | ✓ | × | ✓ |
| 377 | ***Coumarin glycoside                                | Coum    | 8.98  | 308 | 309 | 309,147,162         | (Tan et al., 2020)                | ✓ | × | ✓ |
| 378 | *Triglyceride                                        | FA      | 9.15  | 176 | 177 | 176                 | (Ragasa et al., 2014)             | ✓ | ✓ | ✓ |
| 379 | **Esculin- <i>O</i> -glucoside                       | Coum    | 9.34  | 340 | 341 | 341,178,163         | (Al-Yousef et al., 2020)          | ✓ | ✓ | ✓ |
| 380 | *Mangostin                                           | Xanth.  | 9.79  | 410 | 409 | 409,341,365,326     | (Melot et al., 2009)              | ✓ | × | ✓ |
| 381 | * Aloe emodin                                        | Anthrq. | 11.12 | 270 | 271 | 241,225,211         | (George et al., 2015)             | ✓ | ✓ | ✓ |
| 382 | **1,1-Dimethyl allyl scopoletin                      | Coum    | 12.28 | 260 | 261 | 261,161             | (Adesanwo et al., 2020)           | ✓ | × | ✓ |
| 383 | ***Resverateroldrv.                                  | Coum.   | 12.36 | 422 | 421 | 421,227             | (Tan et al., 2020)                | ✓ | ✓ | ✓ |
| 384 | *Citroside                                           | MG      | 13.99 | 386 | 386 | 385                 | (Moghadamtousi et al., 2015)      | ✓ | ✓ | ✓ |
| 385 | *Annoionol B                                         | MG      | 14.03 | 244 | 245 | 245                 | (Moghadamtousi et al., 2015)      | ✓ | ✓ | ✓ |
| 386 | *Annoionol C                                         | MG      | 14.25 | 244 | 245 | 245                 | (Moghadamtousi et al., 2015)      | ✓ | ✓ | ✓ |
| 387 | *Rosioside                                           | MG      | 14.67 | 386 | 385 | 385                 | (Moghadamtousi et al., 2015)      | ✓ | ✓ | ✓ |
| 388 | *Loliolide                                           | MG      | 16.43 | 196 | 197 | 196                 | (Moghadamtousi et al., 2015)      | ✓ | ✓ | ✓ |
| 389 | *(+)-Epiloliolide                                    | MG      | 16.81 | 196 | 197 | 196                 | (Moghadamtousi et al., 2015)      | ✓ | ✓ | ✓ |
| 390 | **phillygenin- <i>O</i> -hexose- <i>O</i> -pentose   | Lignan  | 17.12 | 666 | 667 | 667,373,534         | (Ozarowski et al., 2018)          | ✓ | ✓ | ✓ |
| 391 | ***7-demethyl suberosin                              | Coum    | 17.52 | 230 | 231 | 231,137             | (Larrazábal-Fuentes et al., 2020) | ✓ | ✓ | ✓ |
| 392 | *(2)-3-hexenyl-B-D-glucoside                         | MG      | 17.54 | 262 | 263 | 263                 | (Moghadamtousi et al., 2015)      | ✓ | ✓ | ✓ |
| 393 | *(1S,2S,4R) trans-2-hydroxy-1,8 cineol-B-D-glucoside | MG      | 17.83 | 332 | 333 | 332                 | Moghadamtousi et al., 2015)       | ✓ | × | ✓ |
| 394 | ***Urolithin-B- drv.                                 | Coum    | 18.58 | 340 | 341 | 341,213             | (Yisimayili et al., 2019)         | ✓ | ✓ | ✓ |
| 395 | ***Chromone drv.                                     | Coum    | 18.70 | 364 | 365 | 325                 | (Simirgiotis et al., 2017)        | ✓ | ✓ | ✓ |
| 396 | ***Pimarane diterp                                   | Diterp. | 18.84 | 330 | 331 | 331,229,205,128     | (Abdelaziz et al., 2020)          | ✓ | ✓ | ✓ |
| 397 | ***Trijuganone A                                     | Diterp  | 19.00 | 294 | 293 | 293,221,177         | (Zhu et al., 2007)                | ✓ | ✓ | ✓ |

|     |                                                     |          |       |     |     |                 |                                                      |   |   |   |
|-----|-----------------------------------------------------|----------|-------|-----|-----|-----------------|------------------------------------------------------|---|---|---|
| 398 | ***15,16-dihydro tanshinone                         | Diterp.  | 19.72 | 278 | 279 | 170,149         | (Zhu et al., 2007)                                   | ✓ | × | ✓ |
| 399 | ***1,2-dihydro tanshinone                           | Diterp.  | 19.95 | 278 | 279 | 200,149         | (Zhu et al., 2007)                                   | ✓ | × | ✓ |
| 400 | ***2,3,19,23-tetra-OH-urs-12-en-28-oic-acid-glucose | Triterp  | 20.17 | 666 | 667 | 667,503,162     | (Hou et al., 2002)                                   | × | × | ✓ |
| 401 | ***2,3,19-tri-OH—urs-12-en-28-oic-acid-glucose      | Triterp  | 22.71 | 650 | 651 | 650,503,162     | (Hou et al., 2002)                                   | ✓ | ✓ | ✓ |
| 402 | ***3-oxo- $\alpha$ -ionyl $\beta$ -d-glucoside      | HC       | 23.73 | 370 | 371 | 357,303,185,163 | (Jia et al., 2017)                                   | × | ✓ | ✓ |
| 403 | * Stigmasterol                                      | Sterol   | 25.75 | 412 | 413 | 413             | (Ragasa et al., 2014)                                | ✓ | ✓ | ✓ |
| 404 | * $\beta$ -sitosterol                               | Sterol   | 26.03 | 414 | 415 | 415             | (Ragasa et al., 2014)                                | ✓ | ✓ | ✓ |
| 405 | **2-Chloroethyl lineolate                           | FA       | 27.66 | 342 | 343 | 342             | (Adesanwo et al., 2020)                              | ✓ | ✓ | ✓ |
| 406 | *** Linoleic acid methylester                       | FA       | 27.73 | 294 | 293 | 293,204         | (Ibrahim, 2012)                                      | ✓ | ✓ | ✓ |
| 407 | *Octadecanoic acid                                  | FA       | 27.87 | 284 | 283 | 283             | (Adesanwo et al., 2020)                              | ✓ | ✓ | ✓ |
| 408 | **Kaur-16-ene                                       | Sisquit. | 29.70 | 272 | 273 | 272             | (Adesanwo et al., 2020)                              | ✓ | ✓ | ✓ |
| 409 | *1,3-Tridecanediol diacetate                        | FA       | 30.11 | 300 | 301 | 301             | (Coria-Téllez et al., 2019) ,(Adesanwo et al., 2020) | ✓ | ✓ | ✓ |
| 410 | **9,10 dehydroisolongifolene                        | Terpene  | 30.33 | 202 | 203 | 203 (M+1)       | (Adesanwo et al., 2020)                              | ✓ | × | ✓ |
| 411 | ** Oleic acid                                       | FA       | 30.24 | 282 | 281 | 281             | (Gomes et al., 2019)                                 | ✓ | ✓ | ✓ |
| 412 | *Palmetic acid                                      | FA       | 30.38 | 256 | 255 | 255             | (Gomes et al., 2019)                                 | ✓ | × | ✓ |
| 413 | * 8-heptadecene                                     | HC       | 30.92 | 238 | 239 | 239             | (Adesanwo et al., 2020, Coria-Téllez et al., 2019)   | ✓ | × | ✓ |
| 414 | **Nonanal                                           | HC       | 31.24 | 142 | 143 | 143             | (Adesanwo et al., 2020)                              | ✓ | ✓ | ✓ |

\*Compounds previously identified in *Annona muricata*

\*\*Compounds identified for the first time in *Annona muricata*

\*\*\*Compounds identified for the first time in *Annona* genus

Alks: alkaloids Coum: coumarin, Diterp: diterpenoid , FA: fatty acids, HC: hydrocarbon, Mg : megastimane , Sesquit: sesquiterpene, Triterp: triterpene, Xanth: xanthene

♠ E: Ethanol extract of the whole fruit , W: Water extract of the edible part of the fruit , C: Aqueous extract of the leaves capsule

♠ The yellow hi light refers to the compounds identified only in the aqueous extract of the leaves capsule

**Figure S1** Some compounds characterised from *A. muricata* aqueous leaves capsules extract extracts

**Acetogenins**

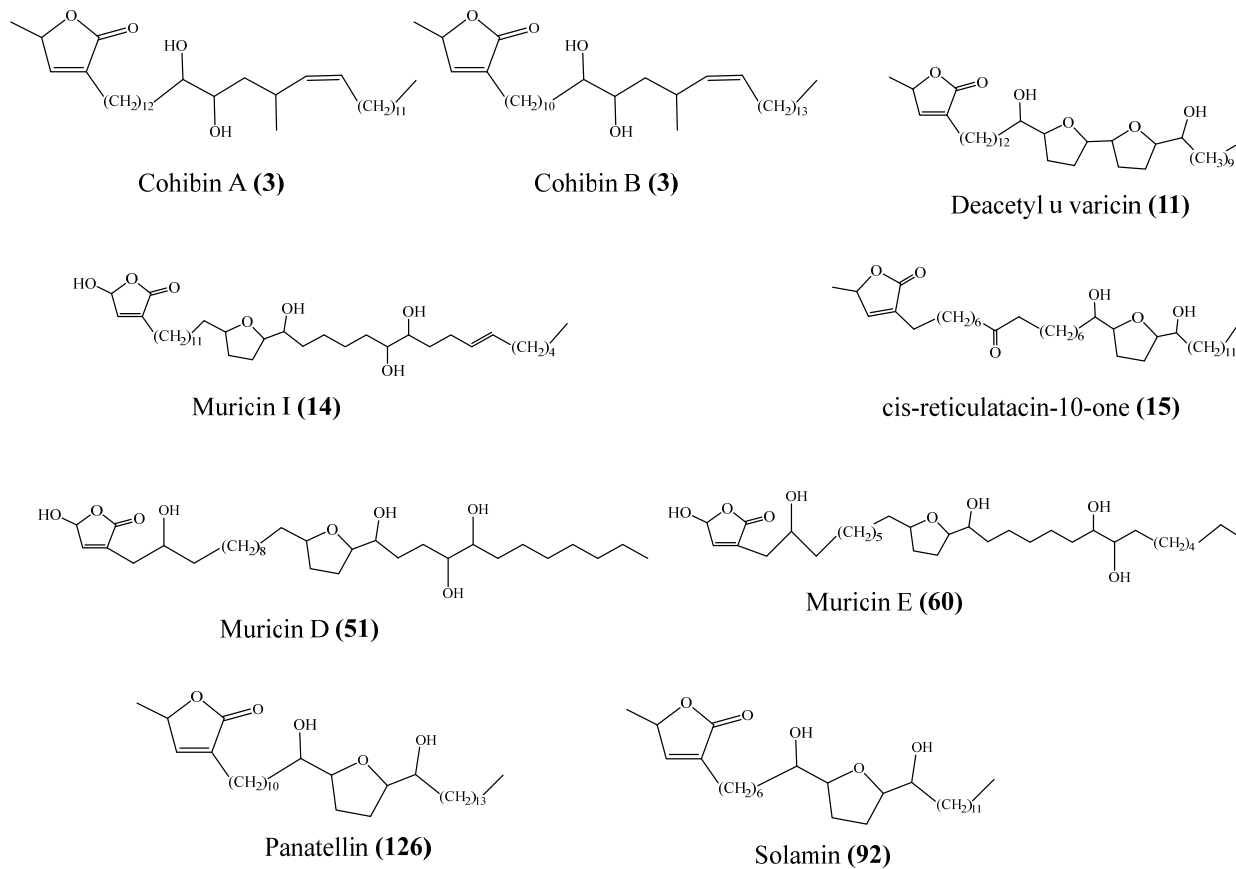

## Phenolic compounds

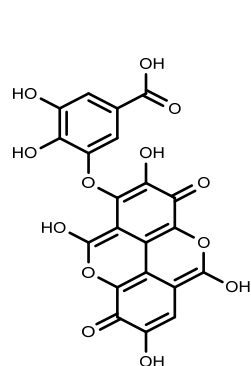

Sanguisorbic acid  
dilactone **(161)**

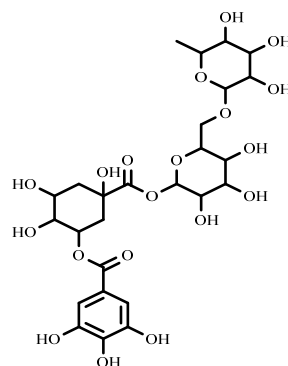

Galloyl-quinic acid  
-rutinoside **(164)**

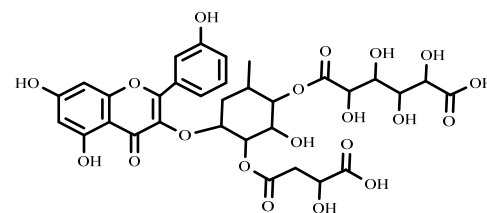

Mucic acid-Kaempferol-  
malic acid-rhamnose **(198)**

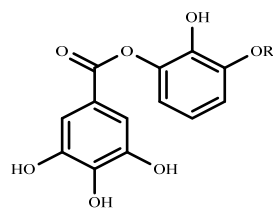

Galloyl-pyrogallol  
drv. **(209)**

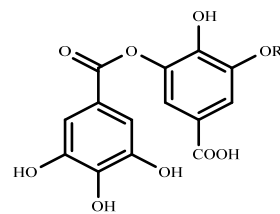

Digalic acid  
drv. **(220)**

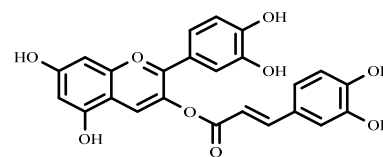

Catechin caffeic  
acid **(222)**

## Flavonoids

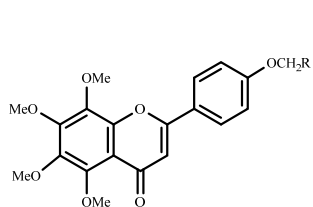

Tangretin-driv. (303)

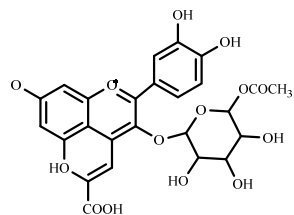

cyanidine-acetylglucoside  
pyruvic acid(244)

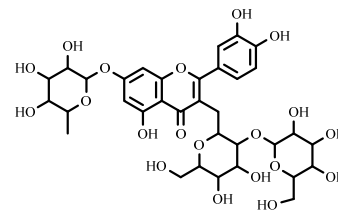

Quercetin-rhamnose-  
sophoroside (258)

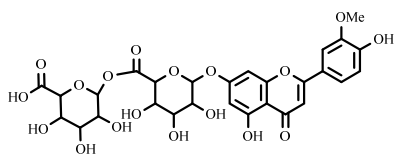

chrysoeriol-7-O-glucouronyl-  
glucouronic acid (247)

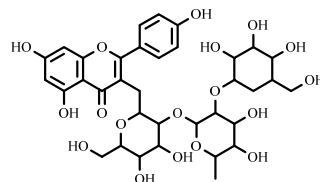

kaempferol-3-O-glucose-  
rhamnose-glucoside (259)

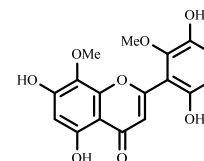

Visldulin III-driv. (304)

## Alkaoids

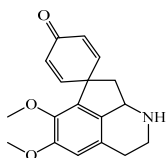

Stepharine (349)

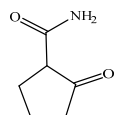

Squamolone (332)

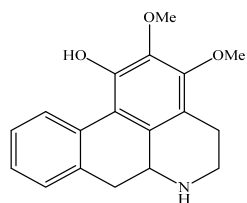

Isopiline (343)

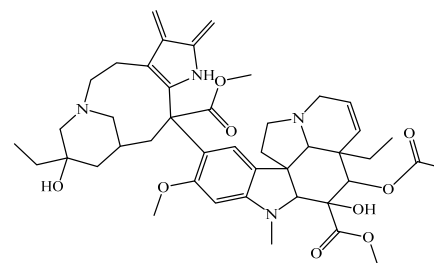

Vinblastine (344)

### Lignan

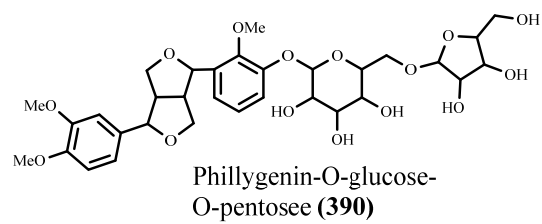

### Triterpene

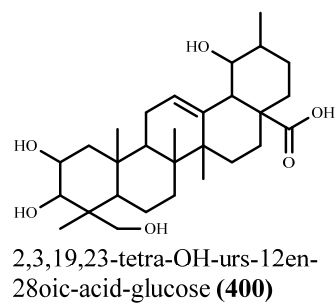

**Figure S2: Photomicrograph of the recorded histopathological changes in the tumor mass and hepatic tissues of different experimental groups**

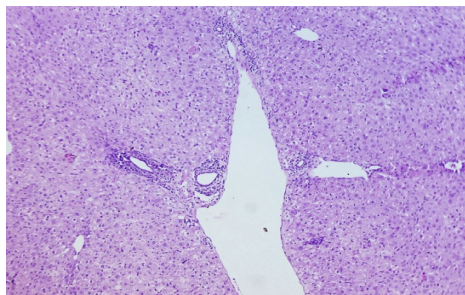

1-negative control liver cells

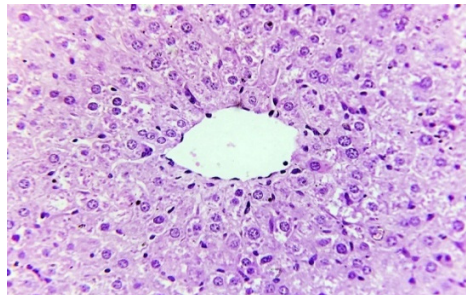

2- negative control liver cells

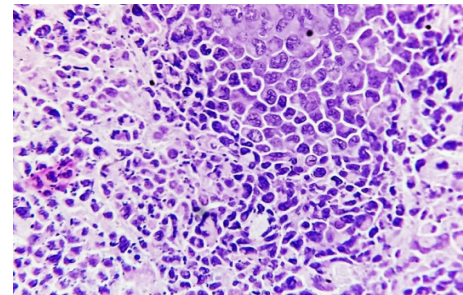

3-negative control tumor mass

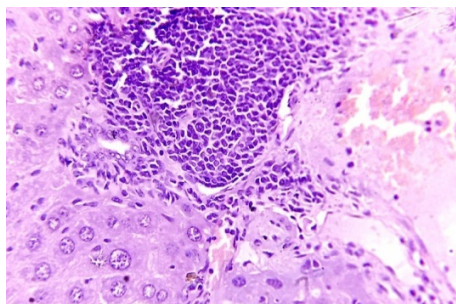

4-positive control liver cells

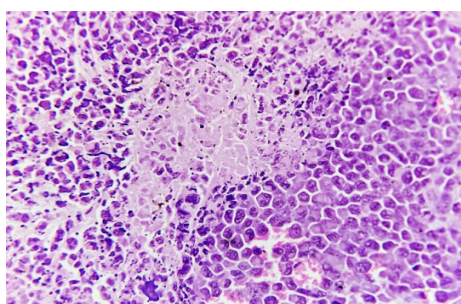

5- tumor mass-leaf extract treatment

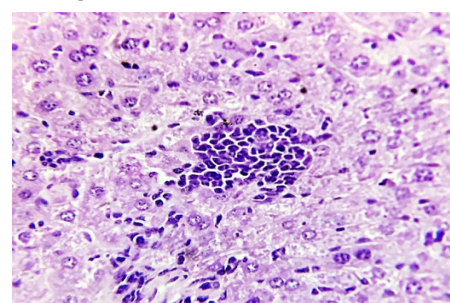

6- liver cells- leaf extract treatment

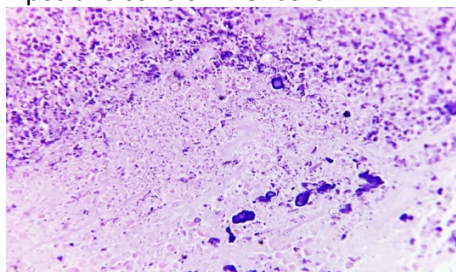

7-tumor mass-cisplatin treatment

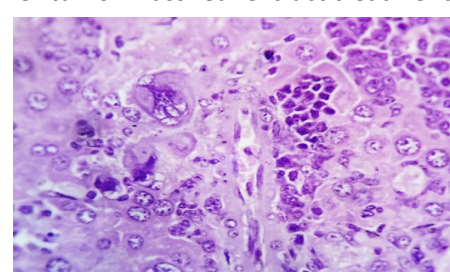

8- liver cells- cisplatin treatment

**Figure S3: Photomicrograph of the recorded immunohistopathological changes in the tumor mass and hepatic tissues of different experimental groups**

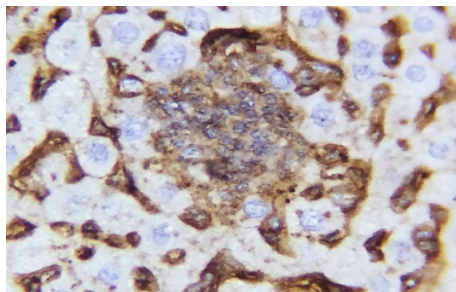

1-ck. tumor free liver

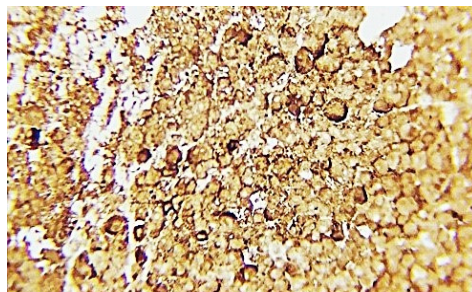

2- Cisplatin ck. tumor mass

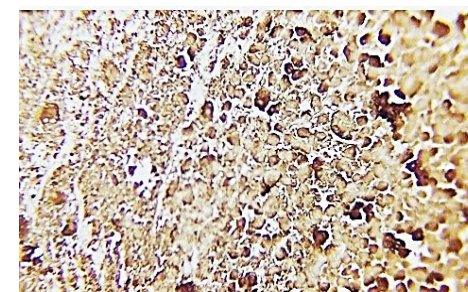

3- Cisplatin P53. tumor mass

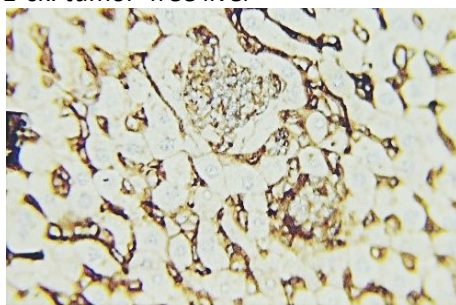

4-Cisplatin ck. liver metastasis

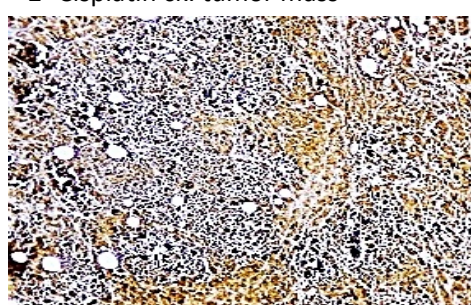

5-ck . control positive tumor mass

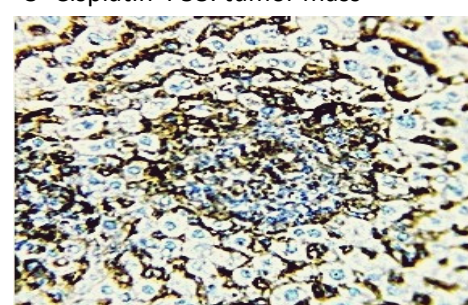

6-ck . control positive liver

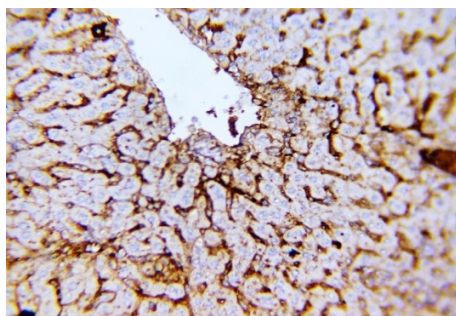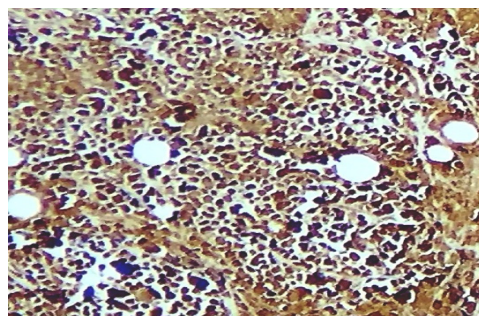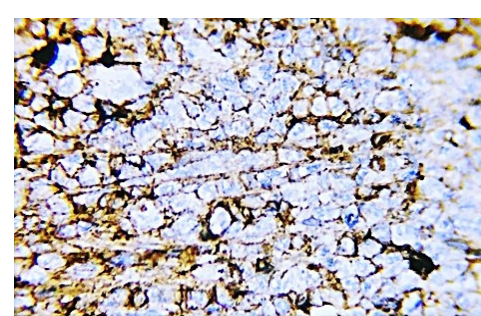

7-ck . control negative liver

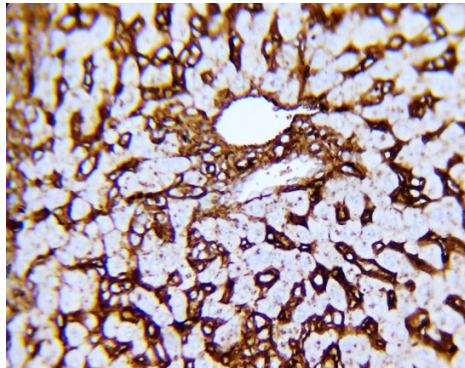

10-P53. control negative liver

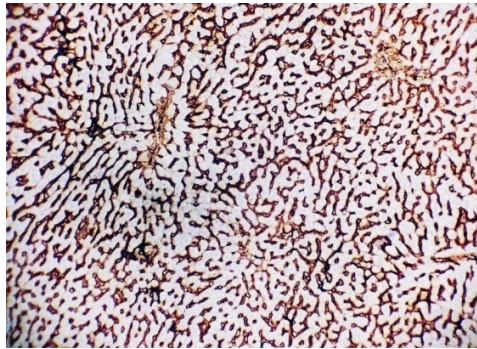

13-P53 Leaves extract treatment

8- ck . control positive tumor mass

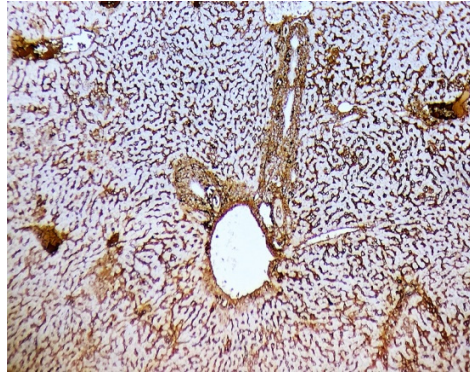

11- P53. control positive liver

9- P53 . control positive tumor mass

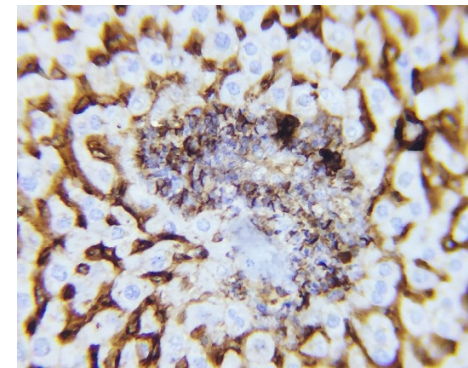

12- P53. liver metastasis

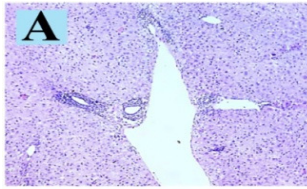

**A**  
Liver..Control Negative.H&E X  
100

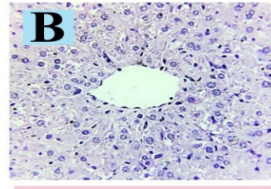

**B**  
Liver .Control negative  
.H&E X 400

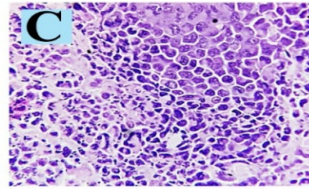

**C**  
TUMOR MASS .CONTROL  
POSITIVE .H&E X 400

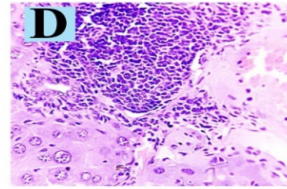

**D**  
Liver .Control positive  
.H&E X 400

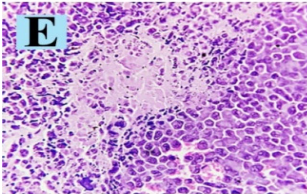

**E**  
Tumor mass .Leaf extract  
treatment . .H&E X 200

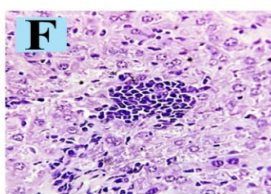

**F**  
Liver Leaf extract  
treatment ..H&E X 200

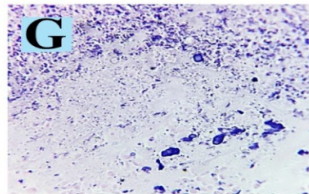

**G**  
Tumor mass .Cisplatin  
treatment ..H&EX 100

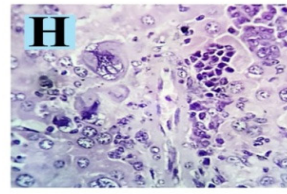

**H**  
Liver . Cisplatin treatment  
.H&E X 400

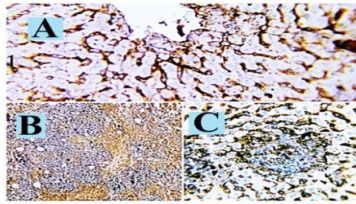

**CK. Control negative liver , control positive tumor mass and liver X 400, 200**

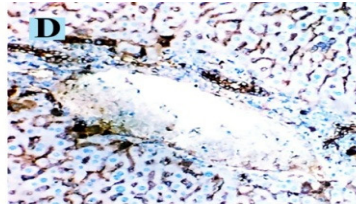

**CK. Leaf extract treatment . X 200**

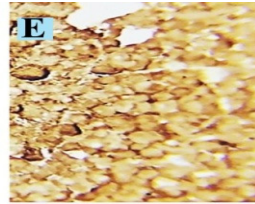

**CK . Cisplatin treatment .Tumor mass and liver X 400**

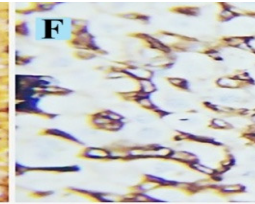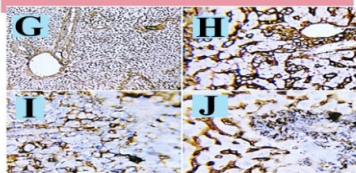

**P53. Control negative liver , control positive tumor mass and liver X 400, 200**

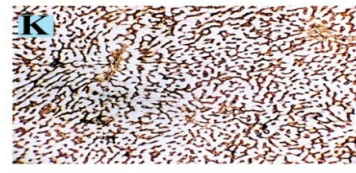

**P53. Leaf extract treatment . X 200**

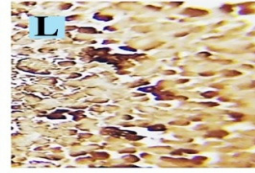

**P53. Cisplatin treatment .Tumor mass and liver X 400**

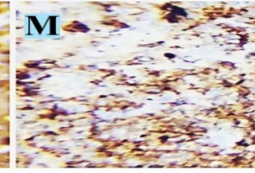

Supplement: s1 [file s1]
